# Supplementary material
Source: bioRxiv or medRxiv preprint supplement (https://medrxiv.org/highwire/filestream/91189/field_highwire_adjunct_files/1/2020.07.25.20149922-2.pdf)
Supplement: Supplementary file [file 2020.07.25.20149922-2.pdf]

# Therapeutic use of cannabis, cannabis-derived products and synthetic cannabinoids for rheumatoid arthritis: Protocol for a systematic review

---

Clara Schulze<sup>1</sup>, Josefina Durán<sup>4,5</sup>, Rocío Bravo-Jeria<sup>3</sup>, Francisca Verdugo-Paiva<sup>2,3</sup>, Macarena Morel<sup>3</sup>, Gabriel Rada<sup>2,3,4</sup>

1. Faculty of Medicine, Pontificia Universidad Católica de Chile, Santiago, Chile.
2. Epistemonikos Foundation, Santiago, Chile.
3. UC Evidence Center, Cochrane Chile Associated Center, Pontificia Universidad Católica de Chile, Santiago, Chile.
4. Internal Medicine Department, Faculty of Medicine, Pontificia Universidad Católica de Chile, Santiago, Chile.
5. Clinical Immunology and Rheumatology Department, Faculty of Medicine, Pontificia Universidad Católica de Chile, Santiago, Chile.

Corresponding author: Gabriel Rada

Email address: [radagabriel@epistemonikos.org](mailto:radagabriel@epistemonikos.org)

Postal address: Holanda 895, Providencia, Santiago, Chile.

## SUPPLEMENTARY MATERIAL

### SEARCH STRATEGY FOR ELECTRONIC DATABASES

#### **MEDLINE (PubMed) search strategy**

#1 "Marijuana Smoking"[Mesh]

#2 "Marijuana Use"[Mesh]

#3 "Dronabinol"[Mesh]

#4 "Cannabinoids"[Mesh]

#5 "Cannabis"[Mesh]

#6 "Medical Marijuana"[Mesh]

#7 "Cannabaceae"[Mesh]

#8 "Endocannabinoids"[Mesh]

#9 cannabi\*

#10 "cannabaceae"

#11 marijuan\*

#12 marihuan\*

#13 "sativa"

#14 phytocannabinoid\*

#15 CBD\*

#16 "Epidiolex"

#17 "ZYN002"  
#18 nabiximol\*  
#19 "Sativex"  
#20 tetrahydrocannab\*  
#21 "THC"  
#22 endocannabinoid\*  
#23 "Delta-9-tetrahydrocannabinol"  
#24 "Delta 9-tetrahydrocannabinol"  
#25 "Delta-9 tetrahydrocannabinol"  
#26 "Delta 9 tetrahydrocannabinol"  
#27 "Delta9-tetrahydrocannabinol"  
#28 "Delta9 tetrahydrocannabinol"  
#29 "Delta9tetrahydrocannabinol"  
#30 "Delta-9tetrahydrocannabinol"  
#31 "Delta 9tetrahydrocannabinol"  
#32 "D-9-tetrahydrocannabinol"  
#33 "D 9-tetrahydrocannabinol"  
#34 "D-9 tetrahydrocannabinol"  
#35 "D 9 tetrahydrocannabinol"  
#36 "D9-tetrahydrocannabinol"  
#37 "D9 tetrahydrocannabinol"  
#38 " $\Delta$ -9-tetrahydrocannabinol"  
#39 " $\Delta$  9-tetrahydrocannabinol"  
#40 " $\Delta$ -9 tetrahydrocannabinol"  
#41 " $\Delta$  9 tetrahydrocannabinol"  
#42 " $\Delta$ 9-tetrahydrocannabinol"  
#43 " $\Delta$ 9 tetrahydrocannabinol"  
#44 " $\Delta$ -9tetrahydrocannabinol"  
#45 " $\Delta$  9tetrahydrocannabinol"  
#46 " $\Delta$ 9tetrahydrocannabinol"  
#47 "9-tetrahydrocannabinol"  
#48 "9 tetrahydrocannabinol"  
#49 "9tetrahydrocannabinol"  
#50 "Delta-9-THC"  
#51 "Delta 9-THC"  
#52 "Delta-9 THC"  
#53 "Delta 9 THC"  
#54 "Delta9-THC"  
#55 "Delta9 THC"  
#56 "Delta9THC"  
#57 "Delta-9THC"  
#58 "Delta 9THC"  
#59 "D-9-THC"  
#60 "D 9-THC"

#61 "D-9 THC"  
#62 "D 9 THC"  
#63 "D9-THC"  
#64 "D9 THC"  
#65 "D 9THC"  
#66 "D9THC"  
#67 " $\Delta$ -9-THC"  
#68 " $\Delta$  9-THC"  
#69 " $\Delta$ -9 THC"  
#70 " $\Delta$  9 THC"  
#71 " $\Delta$ 9-THC"  
#72 " $\Delta$ 9 THC"  
#73 " $\Delta$ -9THC"  
#74 " $\Delta$  9THC"  
#75 " $\Delta$ 9THC"  
#76 "Trans delta-9-tetrahydrocannabinol"  
#77 "Trans-delta 9-tetrahydrocannabinol"  
#78 "Trans-delta-9 tetrahydrocannabinol"  
#79 "Trans delta 9 tetrahydrocannabinol"  
#80 "Trans delta-9 tetrahydrocannabinol"  
#81 "Trans-delta 9 tetrahydrocannabinol"  
#82 "Trans delta 9-tetrahydrocannabinol"  
#83 "Transdelta-9 tetrahydrocannabinol"  
#84 "Transdelta 9-tetrahydrocannabinol"  
#85 "Transdelta 9 tetrahydrocannabinol"  
#86 "Trans-delta9-tetrahydrocannabinol"  
#87 "Trans delta9-tetrahydrocannabinol"  
#88 "Trans-delta9 tetrahydrocannabinol"  
#89 "Trans delta9 tetrahydrocannabinol"  
#90 "Transdelta 9tetrahydrocannabinol"  
#91 "Trans-d-9 tetrahydrocannabinol"  
#92 "Transd-9 tetrahydrocannabinol"  
#93 "Trans-d9 tetrahydrocannabinol"  
#94 "Transd9 tetrahydrocannabinol"  
#95 "Trans  $\Delta$ -9-tetrahydrocannabinol"  
#96 "Trans- $\Delta$  9-tetrahydrocannabinol"  
#97 "Trans- $\Delta$ -9 tetrahydrocannabinol"  
#98 "Trans  $\Delta$  9 tetrahydrocannabinol"  
#99 "Trans  $\Delta$ -9 tetrahydrocannabinol"  
#100 "Trans- $\Delta$  9 tetrahydrocannabinol"  
#101 "Trans  $\Delta$  9-tetrahydrocannabinol"  
#102 "Trans $\Delta$  9-tetrahydrocannabinol"  
#103 "Trans $\Delta$ -9 tetrahydrocannabinol"  
#104 "Trans $\Delta$  9 tetrahydrocannabinol"

#105 "Trans- $\Delta$ 9-tetrahydrocannabinol"  
#106 "Trans  $\Delta$ 9-tetrahydrocannabinol"  
#107 "Trans- $\Delta$ 9 tetrahydrocannabinol"  
#108 "Trans  $\Delta$ 9 tetrahydrocannabinol"  
#109 "Trans $\Delta$  9tetrahydrocannabinol"  
#110 "Trans delta-9-THC"  
#111 "Trans-delta 9-THC"  
#112 "Trans-delta-9 THC"  
#113 "Trans delta 9 THC"  
#114 "Trans delta-9 THC"  
#115 "Trans-delta 9 THC"  
#116 "Trans delta 9-THC"  
#117 "Transdelta 9-THC"  
#118 "Transdelta-9 THC"  
#119 "Transdelta 9 THC"  
#120 "Trans delta9-THC"  
#121 "Trans-delta9 THC"  
#122 "Trans delta9 THC"  
#123 "Trans delta-9THC"  
#124 "Trans delta 9THC"  
#125 "Transdelta 9THC"  
#126 "Trans delta9THC"  
#127 "Trans-d-9 THC"  
#128 "Transd-9 THC"  
#129 "Trans-d9 THC"  
#130 "Transd9 THC"  
#131 "Trans- $\Delta$ -9-THC"  
#132 "Trans  $\Delta$ -9-THC"  
#133 "Trans- $\Delta$  9-THC"  
#134 "Trans- $\Delta$ -9 THC"  
#135 "Trans  $\Delta$  9 THC"  
#136 "Trans  $\Delta$ -9 THC"  
#137 "Trans- $\Delta$  9 THC"  
#138 "Trans  $\Delta$  9-THC"  
#139 "Trans $\Delta$  9-THC"  
#140 "Trans $\Delta$ -9 THC"  
#141 "Trans $\Delta$  9 THC"  
#142 "Trans  $\Delta$ 9-THC"  
#143 "Trans- $\Delta$ 9 THC"  
#144 "Trans  $\Delta$ 9 THC"  
#145 "Trans  $\Delta$ -9THC"  
#146 "Trans  $\Delta$  9THC"  
#147 "Trans  $\Delta$ 9THC"  
#148 "Trans $\Delta$  9THC"

#149 Dronabinol\*  
#150 "Marinol"  
#151 "THCV"  
#152 Nabilo\*  
#153 "Cesamet"  
#154 "Canemes"  
#155 "Levonantradol"  
#156 "Delta-1-tetrahydrocannabinol"  
#157 "Delta 1-tetrahydrocannabinol"  
#158 "Delta-1 tetrahydrocannabinol"  
#159 "Delta 1 tetrahydrocannabinol"  
#160 "Delta1-tetrahydrocannabinol"  
#161 "Delta1 tetrahydrocannabinol"  
#162 "Delta-1tetrahydrocannabinol"  
#163 "Delta 1tetrahydrocannabinol"  
#164 "D 1-tetrahydrocannabinol"  
#165 "D-1 tetrahydrocannabinol"  
#166 "D 1 tetrahydrocannabinol"  
#167 "D1 tetrahydrocannabinol"  
#168 " $\Delta$ -1-tetrahydrocannabinol"  
#169 " $\Delta$  1-tetrahydrocannabinol"  
#170 " $\Delta$ -1 tetrahydrocannabinol"  
#171 " $\Delta$  1 tetrahydrocannabinol"  
#172 " $\Delta$ 1-tetrahydrocannabinol"  
#173 " $\Delta$ 1 tetrahydrocannabinol"  
#174 " $\Delta$ -1tetrahydrocannabinol"  
#175 " $\Delta$  1tetrahydrocannabinol"  
#176 "1-tetrahydrocannabinol"  
#177 "1 tetrahydrocannabinol"  
#178 "1tetrahydrocannabinol"  
#179 "1-THC"  
#180 "1 THC"  
#181 "Delta-1-THC"  
#182 "Delta 1-THC"  
#183 "Delta-1 THC"  
#184 "Delta 1 THC"  
#185 "Delta1-THC"  
#186 "Delta1 THC"  
#187 "Delta1THC"  
#188 "D 1-THC"  
#189 "D-1 THC"  
#190 "D 1 THC"  
#191 "D1 THC"  
#192 " $\Delta$ -1-THC"

#193 " $\Delta$  1-THC"  
#194 " $\Delta$ -1 THC"  
#195 " $\Delta$  1 THC"  
#196 " $\Delta$ 1-THC"  
#197 " $\Delta$ 1 THC"  
#198 " $\Delta$ 1THC"  
#199 Ajulemic\*  
#200 "JBT-101"  
#201 "anabasum"  
#202 "Lenabasum"  
#203 "Resunab"  
#204 "GW842166"  
#205 "AZD1940"  
#206 "FAAH"  
#207 "PF04457845"  
#208 "PF-04457845"  
#209 "PF 04457845"  
#210 "fatty acid amide"  
#211 "fatty-acid amide"  
#212 "fatty-acid-amide"  
#213 "amidohydrolase"  
#214 "hemp"  
#215 "THC:CBD"  
#216 "CBD:THC"  
#217 echinacea\*  
#218 "JWH 071"  
#219 "JWH-018-Br"  
#220 "JWH 018-Br"  
#221 "JWH-018 Br"  
#222 "JWH 018 Br"  
#223 "JWH018 Br"  
#224 "JWH-018Br"  
#225 "JWH 018Br"  
#226 "JWH-018-Cl"  
#227 "JWH 018-Cl"  
#228 "JWH-018 Cl"  
#229 "JWH 018 Cl"  
#230 "JWH018 Cl"  
#231 "JWH 018Cl"  
#232 "JWH-007"  
#233 "JWH007"  
#234 "JWH 007"  
#235 "JWH-203"  
#236 "JWH203"

#237 "JWH 203"  
#238 "JWH-250"  
#239 "JWH250"  
#240 "JWH 250"  
#241 "JWH-398"  
#242 "JWH 398"  
#243 "7'N-5F-ADB"  
#244 "7'N 5F-ADB"  
#245 "7'N-5F ADB"  
#246 "7'N 5F ADB"  
#247 "7'N 5FADB"  
#248 "ADB-CHMINACA"  
#249 "MAB-CHMINACA"  
#250 "MAB CHMINACA"  
#251 "MN-18"  
#252 "MN18"  
#253 "5F-MN-18"  
#254 "5F MN-18"  
#255 "5F-MN 18"  
#256 "5F MN 18"  
#257 "5FMN 18"  
#258 "CBL(N)2201"  
#259 "MDMB(N)-BZ-F"  
#260 "MDMB(N) BZ-F"  
#261 "MDMB(N)-BZ F"  
#262 "MDMB(N)BZ-F"  
#263 "MDMB(N)BZ F"  
#264 "FU AEB"  
#265 "5F EMB-FUBINACA"  
#266 "5F-EMB FUBINACA"  
#267 "5F EMB FUBINACA"  
#268 "5FEMB FUBINACA"  
#269 "FUB AMB-Ethylester"  
#270 "ADAMANTYL CHMINACA"  
#271 "5F JWH-018-N"  
#272 "5F JWH 018 N"  
#273 "5F JWH-018 N"  
#274 "5F JWH 018-N"  
#275 "5F JWH018 N"  
#276 "5FJWH 018N"  
#277 "5F THJ-018"  
#278 "5F-THJ 018"  
#279 "5F THJ 018"  
#280 "5FTHJ 018"

#281 "THJ-2201"  
#282 "THJ 2201"  
#283 "5CI-THJ-018"  
#284 "5CI THJ-018"  
#285 "5CI-THJ 018"  
#286 "5CI THJ 018"  
#287 "5CITHJ 018"  
#288 "5CI JWH 018-N"  
#289 "5CI JWH018-N"  
#290 "5CI-JWH 018N"  
#291 "5CI JWH-018N"  
#292 "5CI JWH018N"  
#293 "5CIJWH 018N"  
#294 "THJ-018"  
#295 "THJ 018"  
#296 "MDMB-N-2201"  
#297 "MDMB N-2201"  
#298 "MDMB-N 2201"  
#299 "MDMB N 2201"  
#300 "MDMB-(N)-2201"  
#301 "MDMB (N)-2201"  
#302 "MDMB-(N) 2201"  
#303 "MDMB (N) 2201"  
#304 "MDMB(N)-2201"  
#305 "MDMB(N) 2201"  
#306 "MDMB-(N)2201"  
#307 "MDMB (N)2201"  
#308 "MDMB(N)2201"  
#309 "4F-MDMB-BINACA"  
#310 "4F MDMB-BINACA"  
#311 "4F-MDMB BINACA"  
#312 "4F MDMB BINACA"  
#313 "4FMDMB BINACA"  
#314 "MN-24"  
#315 "MN24"  
#316 "MN 24"  
#317 "SDB-001"  
#318 "SDB 001"  
#319 "MMB-CHMICA"  
#320 "MMB CHMICA"  
#321 "NNL-3"  
#322 "NNL 3"  
#323 "AKB-48"  
#324 "AKB48"



#325 "AKB 48"  
#326 "5F-AKB-48"  
#327 "5F AKB-48"  
#328 "5F-AKB 48"  
#329 "5F AKB 48"  
#330 "5FAKB-48"  
#331 "5FAKB 48"  
#332 "5F-AKB48"  
#333 "5F AKB48"  
#334 "CP-47,497"  
#335 "CP 47,497"  
#336 "CP47,497"  
#337 "(C7)-CP-47,497"  
#338 "(C7) CP-47,497"  
#339 "(C7)-CP 47,497"  
#340 "(C7) CP 47,497"  
#341 "(C7)CP-47,497"  
#342 "(C7)CP 47,497"  
#343 "3-[2-hydroxy-4-(2-methyloctan-2-yl)phenyl]cyclohexan-1-ol"  
#344 "CP-47,497-C8"  
#345 "CP 47,497-C8"  
#346 "CP-47,497 C8"  
#347 "CP 47,497 C8"  
#348 "CP47,497-C8"  
#349 "CP47,497 C8"  
#350 "CP-47,497C8"  
#351 "CP47,497C8"  
#352 "5F-APINACA"  
#353 "5F APINACA"  
#354 "A PINACA"  
#355 "APINACA"  
#356 "SGT 263"  
#357 "PX-2"  
#358 "PX 2"  
#359 "PX2"  
#360 "PX-3"  
#361 "PX 3"  
#362 "PX3"  
#363 "5F-SDB-005"  
#364 "5F SDB-005"  
#365 "5F-SDB 005"  
#366 "5F SDB 005"  
#367 "5FSDB 005"  
#368 "CUMYL-4CN-B7AICA"

#369 "CUMYL 4CN-B7AICA"  
#370 "CUMYL-4CN B7AICA"  
#371 "CUMYL 4CN B7AICA"  
#372 "CUMYL4CN B7AICA"  
#373 "CUMYL 4CNB7AICA"  
#374 "CUMYL 5F-P7AICA"  
#375 "CUMYL-5F P7AICA"  
#376 "CUMYL5F P7AICA"  
#377 "CUMYL 5FP7AICA"  
#378 "5F-AB-P7AICA"  
#379 "5F AB-P7AICA"  
#380 "5F-AB P7AICA"  
#381 "5F AB P7AICA"  
#382 "5FAB P7AICA"  
#383 "5F-MDMB-P7AICA"  
#384 "5F MDMB-P7AICA"  
#385 "5F-MDMB P7AICA"  
#386 "5F MDMB P7AICA"  
#387 "5FMDMB P7AICA"  
#388 "MDMB PCZCA"  
#389 "DMBA-CHMINACA"  
#390 "DMBA CHMINACA"  
#391 "A THPINACA"  
#392 "ADAMANTYL-THPINACA"  
#393 "ADAMANTYL THPINACA"  
#394 "2F-AB PINACA"  
#395 "APP FUBINACA"  
#396 "5CI-MDMB PINACA"  
#397 "5CI MDMB PINACA"  
#398 "5CIMDMB PINACA"  
#399 "5CI MDMBPINACA"  
#400 "5CI ADB"  
#401 "5F-ADB-PINACA"  
#402 "5F ADB-PINACA"  
#403 "5F-ADB PINACA"  
#404 "5F ADB PINACA"  
#405 "5FADB PINACA"  
#406 "5F-APP PINACA"  
#407 "5F APP PINACA"  
#408 "5FAPP PINACA"  
#409 "5F-AMB-PINACA"  
#410 "5F AMB-PINACA"  
#411 "5F-AMB PINACA"  
#412 "5F AMB PINACA"

#413 "5FAMB PINACA"  
#414 "MO CHMINACA"  
#415 "MO AMB"  
#416 "MOAMB"  
#417 "MDMB CHMINAC"  
#418 "CUMYL-PINACA"  
#419 "CUMYL PINACA"  
#420 "5F-EMB-PINACA"  
#421 "5F EMB-PINACA"  
#422 "5F-EMB PINACA"  
#423 "5F EMB PINACA"  
#424 "5FEMB PINACA"  
#425 "AB-FUBINACA"  
#426 "AB FUBINACA"  
#427 "APP-CHMINACA"  
#428 "APP CHMINACA"  
#429 "4 CN-CUMYL-BINACA"  
#430 "4-CN-CUMYL BINACA"  
#431 "4 CN-CUMYL BINACA"  
#432 "4CN CUMYL-BINACA"  
#433 "4CN-CUMYL BINACA"  
#434 "4CN CUMYL BINACA"  
#435 "4 CNCUMYL-BINACA"  
#436 "4-CNCUMYL BINACA"  
#437 "4 CNCUMYL BINACA"  
#438 "4 CN-CUMYLBINACA"  
#439 "4-CN CUMYLBINACA"  
#440 "4CNCUMYL BINACA"  
#441 "4 CNCUMYLBINACA"  
#442 "4CN CUMYLBINACA"  
#443 "CUMYL CB-PINACA"  
#444 "CUMYL-CB PINACA"  
#445 "CUMYLCB PINACA"  
#446 "CUMYL CBPINACA"  
#447 "CUMYL CY-BINACA"  
#448 "CUMYL-CY BINACA"  
#449 "CUMYLCY BINACA"  
#450 "CUMYL CYBINACA"  
#451 "SDB-005"  
#452 "SDB 005"  
#453 "SGT 78"  
#454 "A CHMINACA"  
#455 "MDMB-4en-PINACA"  
#456 "MDMB 4en-PINACA"

#457 "MDMB-4en PINACA"  
#458 "MDMB 4en PINACA"  
#459 "MDMB4en PINACA"  
#460 "MDMB 4enPINACA"  
#461 "CUMYL-4CN-BINACA"  
#462 "CUMYL 4CN-BINACA"  
#463 "CUMYL-4CN BINACA"  
#464 "CUMYL 4CN BINACA"  
#465 "CUMYL4CN BINACA"  
#466 "CUMYL 4CNBINACA"  
#467 "5F-CUMYL-PINACA"  
#468 "5F CUMYL-PINACA"  
#469 "5F-CUMYL PINACA"  
#470 "5F CUMYL PINACA"  
#471 "5FCUMYL PINACA"  
#472 "CUMYL-5F-PINACA"  
#473 "CUMYL 5F-PINACA"  
#474 "CUMYL-5F PINACA"  
#475 "CUMYL 5F PINACA"  
#476 "CUMYL5F PINACA"  
#477 "CUMYL 5FPINACA"  
#478 "5CI-AB-PINACA"  
#479 "5CI AB-PINACA"  
#480 "5CI-AB PINACA"  
#481 "5CI AB PINACA"  
#482 "5CIAB PINACA"  
#483 "ADB-FUBINACA"  
#484 "ADB FUBINACA"  
#485 "ADB-PINACA"  
#486 "ADB PINACA"  
#487 "5F-PY-PINACA"  
#488 "5F PY-PINACA"  
#489 "5F-PY PINACA"  
#490 "5F PY PINACA"  
#491 "5CI UR-144"  
#492 "5CI-UR 144"  
#493 "5CI UR 144"  
#494 "5CIUR 144"  
#495 "FDU-PB-22"  
#496 "FDU PB-22"  
#497 "FDU-PB 22"  
#498 "FDU PB 22"  
#499 "FDUPB 22"  
#500 "NNEI"

#501 "AM XIAO"  
#502 "AM-679"  
#503 "AM 679"  
#504 "AM679"  
#505 "AM-694"  
#506 "AM 694"  
#507 "AM694"  
#508 "JWH 387"  
#509 "WIN 48,098"  
#510 "WIN48,098"  
#511 "AM-2232"  
#512 "AM 2232"  
#513 "JWH-019"  
#514 "JWH019"  
#515 "JWH 019"  
#516 "JWH-022"  
#517 "JWH 022"  
#518 "JWH-081"  
#519 "JWH081"  
#520 "JWH 081"  
#521 "F2201"  
#522 "JWH-412"  
#523 "JWH 412"  
#524 "UR-144"  
#525 "UR144"  
#526 "UR 144"  
#527 "AM-2233"  
#528 "AM2233"  
#529 "AM 2233"  
#530 "EAM-2201"  
#531 "EAM2201"  
#532 "EAM 2201"  
#533 "JWH-210"  
#534 "JWH 210"  
#535 "JWH-015"  
#536 "JWH015"  
#537 "JWH 015"  
#538 "AB-001"  
#539 "AB001"  
#540 "AB 001"  
#541 "JWH-251"  
#542 "JWH 251"  
#543 "CBL 018"  
#544 "FUB JWH-018"

#545 "FUB-JWH 018"  
#546 "FUB JWH 018"  
#547 "FUBJWH 018"  
#548 "FUB-JWH018"  
#549 "FUB JWH018"  
#550 "FUB 018"  
#551 "JWH-302"  
#552 "JWH 302"  
#553 "ADB-CHMICA"  
#554 "ADB CHMICA"  
#555 "AB-005"  
#556 "AB005"  
#557 "AB 005"  
#558 "ADB ICA"  
#559 "ADBICA"  
#560 "AM-1248"  
#561 "AM 1248"  
#562 "BB-22"  
#563 "BB 22"  
#564 "BB22"  
#565 "QUCHIC"  
#566 "FUB-PB-22"  
#567 "FUB-PB 22"  
#568 "FUB PB-22"  
#569 "FUB PB 22"  
#570 "FUBPB 22"  
#571 "AM-1220"  
#572 "AM1220"  
#573 "AM 1220"  
#574 "NRG-4"  
#575 "NRG4"  
#576 "NRG 4"  
#577 "RCS-4"  
#578 "RCS4"  
#579 "RCS 4"  
#580 "PX-1"  
#581 "PX1"  
#582 "PX 1"  
#583 "5F-APP-PICA"  
#584 "5F APP-PICA"  
#585 "5F APP PICA"  
#586 "5FSDB 006"  
#587 "A-796,260"  
#588 "A796,260"

#589 "A 796,260"  
#590 "A-834,735"  
#591 "5F-ADBICA"  
#592 "5F ADBICA"  
#593 "5F-ADB PICA"  
#594 "5F ADB PICA"  
#595 "JWH-018"  
#596 "JWH018"  
#597 "JWH 018"  
#598 "CHM 018"  
#599 "NE-CHMIMO"  
#600 "NE CHMIMO"  
#601 "MMB-2201"  
#602 "MMB 2201"  
#603 "CUMYL-BICA"  
#604 "CUMYL BICA"  
#605 "CUMYL-PICA"  
#606 "CUMYL PICA"  
#607 "5-Fluor NNEI"  
#608 "5 Fluor-NNEI"  
#609 "5Fluor NNEI"  
#610 "5 FluorNNEI"  
#611 "5F NNEI"  
#612 "AM-6527"  
#613 "AM6527"  
#614 "AM 6527"  
#615 "AM-2201"  
#616 "AM2201"  
#617 "AM 2201"  
#618 "JWH-073"  
#619 "JWH073"  
#620 "JWH 073"  
#621 "MAM-2201"  
#622 "MAM2201"  
#623 "MAM 2201"  
#624 "MDMB-CHMICA"  
#625 "MDMB CHMICA"  
#626 "JWH-200"  
#627 "JWH 200"  
#628 "JWH-122"  
#629 "JWH122"  
#630 "JWH 122"  
#631 "FUB UR-144"  
#632 "FUB UR 144"

#633 "FUB-UR 144"  
#634 "FUBUR 144"  
#635 "FUB 144"  
#636 "5F-PB-22"  
#637 "5F PB-22"  
#638 "5F PB 22"  
#639 "5F-PB 22"  
#640 "5F-PB22"  
#641 "5F PB22"  
#642 "KM X1"  
#643 "KM-X1"  
#644 "KMx-1"  
#645 "KMx 1"  
#646 "KMx1"  
#647 "TMCP 018"  
#648 "MN-001"  
#649 "MN001"  
#650 "MN 001"  
#651 "MDMB-FUBICA"  
#652 "MDMB FUBICA"  
#653 "5F MDMB-2201"  
#654 "5F MDMB 2201"  
#655 "MDMB-2201"  
#656 "MDMB 2201"  
#657 "5F-MDMB-PICA"  
#658 "5F MDMB-PICA"  
#659 "5F-MDMB PICA"  
#660 "5F MDMB PICA"  
#661 "AMB-CHMICA"  
#662 "AMB CHMICA"  
#663 "CBL-2201"  
#664 "CBL2201"  
#665 "CBL 2201"  
#666 "NM-2201"  
#667 "NM2201"  
#668 "NM 2201"  
#669 "STS-135"  
#670 "STS135"  
#671 "STS 135"  
#672 "5F-APICA"  
#673 "5F APICA"  
#674 "5F-CUMYL-PICA"  
#675 "5F CUMYL-PICA"  
#676 "5F-CUMYL PICA"



#677 "5F CUMYL PICA"  
#678 "PB-22"  
#679 "PB22"  
#680 "PB 22"  
#681 "5F-AB 144"  
#682 "5F AB 144"  
#683 "5FAB 144"  
#684 "5FADBICA 144"  
#685 "5F-AMBICA"  
#686 "5F AMBICA"  
#687 "XLR-11"  
#688 "XLR11"  
#689 "XLR 11"  
#690 "5 FUR-144"  
#691 "5FUR-144"  
#692 "5FUR 144"  
#693 "5 FUR144"  
#694 "SDB-006"  
#695 "SDB 006"  
#696 "5F APINAC"  
#697 "5F-PY-PICA"  
#698 "5F PY-PICA"  
#699 "5F-PY PICA"  
#700 "5F PY PICA"  
#701 "CRA13"  
#702 "CB-13"  
#703 "CB13"  
#704 "CB 13"  
#705 "SAB-378"  
#706 "SAB378"  
#707 "SAB 378"  
#708 "AZ-037"  
#709 "AZ 037"  
#710 "5F-5,3-AB-PFUPPYCA"  
#711 "5F-5,3 AB-PFUPPYCA"  
#712 "5F 5,3 AB PFUPPYCA"  
#713 "5F5,3-AB-PFUPPYCA"  
#714 "5F5,3 AB-PFUPPYCA"  
#715 "5F-5,3AB-PFUPPYCA"  
#716 "5F-5,3-ABPFUPPYCA"  
#717 "5F-5,3 ABPFUPPYCA"  
#718 "5F5,3AB-PFUPPYCA"  
#719 "5F-5,3ABPFUPPYCA"  
#720 "5F5,3-ABPFUPPYCA"

#721 "5F5,3 ABPFUPPYCA"  
#722 "5F5,3ABPFUPPYCA"  
#723 "5F-SGT-151"  
#724 "5F SGT-151"  
#725 "5F-SGT 151"  
#726 "5F SGT 151"  
#727 "5FSGT 151"  
#728 "5F-SGT151"  
#729 "5F-CUMYL-PeGaClone"  
#730 "5F CUMYL-PeGaClone"  
#731 "5F-CUMYL PeGaClone"  
#732 "5F CUMYL PeGaClone"  
#733 "5FCUMYL PeGaClone"  
#734 "SGT-151"  
#735 "SGT 151"  
#736 "CUMYL-PeGaClone"  
#737 "CUMYL PeGaClone"  
#738 "CUMYL CH-MeGaClone"  
#739 "CUMYL-CH MeGaClone"  
#740 "CUMYLCH MeGaClone"  
#741 "CUMYL CHMeGaClone"  
#742 "JWH 145"  
#743 "JWH-030"  
#744 "JWH 030"  
#745 "JWH-307"  
#746 "JWH 307"  
#747 "JWH 182"  
#748 "JWH 370"  
#749 "JWH 368"  
#750 "A-836,339"  
#751 "MDA-19"  
#752 "MDA19"  
#753 "MDA 19"  
#754 "HU-210"  
#755 "HU210"  
#756 "HU 210"  
#757 "HU-331"  
#758 "HU331"  
#759 "HU 331"  
#760 "Trans-CP-47,497-C8"  
#761 "Trans CP-47,497-C8"  
#762 "Trans-CP 47,497-C8"  
#763 "Trans-CP-47,497 C8"  
#764 "Trans-CP 47,497 C8"

#765 "Trans CP 47,497C8"  
#766 "Trans CP 47,497-C8"  
#767 "Trans CP 47,497 C8"  
#768 "TransCP-47,497-C8"  
#769 "TransCP 47,497-C8"  
#770 "TransCP-47,497 C8"  
#771 TransCP 47,497 C8  
#772 "Trans-CP47,497-C8"  
#773 "Trans-CP47,497 C8"  
#774 "Trans-CP-47,497C8"  
#775 "Trans-CP 47,497C8"  
#776 "TransCP47,497-C8"  
#777 "TransCP47,497 C8"  
#778 "Trans CP47,497C8"  
#779 "TransCP 47,497C8"  
#780 "WIN 55212-2"  
#781 "WIN-55212-2"  
#782 "WIN55212-2"  
#783 "WIN 55212 2"  
#784 "WIN552122"  
#785 "WIN-55212 2"  
#786 "WIN55212 2"  
#787 "5F-ADB"  
#788 "5F ADB"  
#789 "5F NPB-22-7N"  
#790 "5F-NPB 22-7N"  
#791 "5F-NPB-22 7N"  
#792 "5F NPB 22 7N"  
#793 "5F-NPB 22 7N"  
#794 "5F NPB-22 7N"  
#795 "5F NPB 22-7N"  
#796 "5FNPB 22-7N"  
#797 "5FNPB-22 7N"  
#798 "5FNPB 22 7N"  
#799 "5F-NPB22 7N"  
#800 "5F NPB22 7N"  
#801 "5F NP B227N"  
#802 "5FNPB22 7N"  
#803 "5FNPB 227N"  
#804 "5F AKB-48-7N"  
#805 "5F-AKB 48-7N"  
#806 "5F-AKB-48 7N"  
#807 "5F AKB 48 7N"  
#808 "5F-AKB 48 7N"

#809 "5F AKB-48 7N"  
#810 "5F AKB 48-7N"  
#811 "5F-AKB 487N"  
#812 "5FAKB48 7N"  
#813 "5F-EDMB-PINACA"  
#814 "5F EDMB-PINACA"  
#815 "5F-EDMB PINACA"  
#816 "5F EDMB PINACA"  
#817 "5FEDMB PINACA"  
#818 "5F-MDMB-PINACA"  
#819 "5F MDMB-PINACA"  
#820 "5F-MDMB PINACA"  
#821 "5F MDMB PINACA"  
#822 "5FMDMB PINACA"  
#823 "EMB-FUBINACA"  
#824 "EMB FUBINACA"  
#825 "EG-018"  
#826 "EG 018"  
#827 "EG-2201"  
#828 "5F-AB-PINACA"  
#829 "5F AB-PINACA"  
#830 "5F-AB PINACA"  
#831 "5F AB PINACA"  
#832 "5FAB PINACA"  
#833 "5F-AMB"  
#834 "5F AMB"  
#835 "AB-CHMINACA"  
#836 "AB CHMINACA"  
#837 "AB-PINACA"  
#838 "AB PINACA"  
#839 "ABPINACA"  
#840 "FUBIMINA"  
#841 "AB-PINACA-CHM"  
#842 "AB PINACA-CHM"  
#843 "AB-PINACA CHM"  
#844 "AB PINACA CHM"  
#845 "TMCP-2201"  
#846 "TMCP 2201"  
#847 "MBA-2201"  
#848 "MBA 2201"  
#849 "QCBL(N)-2201"  
#850 "QCBL(N) 2201"  
#851 "QCBL(N)2201"  
#852 "CP55, 940"

#853 "CP55,940"  
#854 "MDMB-CHMINACA"  
#855 "MDMB CHMINACA"  
#856 "AMB-FUBINACA"  
#857 "AMB FUBINACA"  
#858 "MMB-FUBINACA"  
#859 "MMB FUBINACA"  
#860 "FUB-AMB"  
#861 "FUB AMB"  
#862 "MDMB-FUBINACA"  
#863 "MDMB FUBINACA"  
#864 "QUPIC"  
#865 "5F-QUPIC"  
#866 "5F QUPIC"  
#867 "NPB-22"  
#868 "NPB 22"  
#869 "5F-NPB-22"  
#870 "5F NPB-22"  
#871 "5F-NPB 22"  
#872 "5F NPB 22"  
#873 "5FNPB 22"  
#874 "FUB-NPB-22"  
#875 "FUB NPB-22"  
#876 "FUB-NPB 22"  
#877 "FUB NPB 22"  
#878 "FUBNPB 22"  
#879 "FUB NPB22"  
#880 "MMB-CHMINACA"  
#881 "MMB CHMINACA"  
#882 "MDMB-CHMCZCA"  
#883 "MDMB CHMCZCA"  
#884 "AMB CHMINACA"  
#885 "win55212"  
#886 "Trans CP-47,497 C8"  
#887 "TransCP 47,497 C8"  
#888 "Trans CP-47,497C8"  
#889 "tetrahydrocannabivarin"  
#890 "cannabigerol"  
#891 "11-hydroxy-THC"  
#892 "11 hydroxy-THC"  
#893 "11-hydroxy THC"  
#894 "11 hydroxy THC"  
#895 "11hydroxy THC"  
#896 "11-hydroxyTHC"

#897 "11 hydroxyTHC"  
#898 "11-OH-THC"  
#899 "11 OH-THC"  
#900 "11-OH THC"  
#901 "11 OH THC"  
#902 "11-OHTHC"  
#903 "11 OHTHC"  
#904 "11-hydroxy-tetrahydrocannabinol"  
#905 "11 hydroxy-tetrahydrocannabinol"  
#906 "11-hydroxy tetrahydrocannabinol"  
#907 "11 hydroxy tetrahydrocannabinol"  
#908 "11hydroxy tetrahydrocannabinol"  
#909 "11-hydroxytetrahydrocannabinol"  
#910 "11 hydroxytetrahydrocannabinol"  
#911 "11 oh-delta-9-THC"  
#912 "11-oh delta-9-THC"  
#913 "11-oh-delta 9-THC"  
#914 "11-oh-delta-9 THC"  
#915 "11 oh delta 9 THC"  
#916 "11-oh delta 9 THC"  
#917 "11 oh-delta 9 THC"  
#918 "11 oh delta-9 THC"  
#919 "11 oh delta 9-THC"  
#920 "11-oh-delta 9 THC"  
#921 "11 oh-delta-9 THC"  
#922 "11 oh delta-9-THC"  
#923 "11-oh delta-9 THC"  
#924 "11 oh-delta 9-THC"  
#925 "11-oh delta 9-THC"  
#926 "11oh-delta 9-THC"  
#927 "11oh-delta-9 THC"  
#928 "11oh-delta 9 THC"  
#929 "11 ohdelta-9-THC"  
#930 "11-ohdelta 9-THC"  
#931 "11-ohdelta-9 THC"  
#932 "11-oh-delta9-THC"  
#933 "11 oh-delta9-THC"  
#934 "11-oh delta9-THC"  
#935 "11-oh-delta9 THC"  
#936 "11 oh delta9 THC"  
#937 "11-oh delta9 THC"  
#938 "11 oh-delta9 THC"  
#939 "11 oh delta9-THC"  
#940 "11 oh-delta-9THC"

#941 "11-oh delta 9THC"  
#942 "11 oh delta 9THC"  
#943 "Delta-8-tetrahydrocannabinol"  
#944 "Delta 8-tetrahydrocannabinol"  
#945 "Delta-8 tetrahydrocannabinol"  
#946 "Delta 8 tetrahydrocannabinol"  
#947 "Delta8-tetrahydrocannabinol"  
#948 "Delta8 tetrahydrocannabinol"  
#949 "Delta 8tetrahydrocannabinol"  
#950 "Delta8tetrahydrocannabinol"  
#951 "D 8-tetrahydrocannabinol"  
#952 "D-8 tetrahydrocannabinol"  
#953 "D 8 tetrahydrocannabinol"  
#954 " $\Delta$ -8-tetrahydrocannabinol"  
#955 " $\Delta$  8-tetrahydrocannabinol"  
#956 " $\Delta$ -8 tetrahydrocannabinol"  
#957 " $\Delta$  8 tetrahydrocannabinol"  
#958 " $\Delta$ 8-tetrahydrocannabinol"  
#959 " $\Delta$ 8 tetrahydrocannabinol"  
#960 " $\Delta$  8tetrahydrocannabinol"  
#961 " $\Delta$ 8tetrahydrocannabinol"  
#962 "Delta-8-THC"  
#963 "Delta 8-THC"  
#964 "Delta-8 THC"  
#965 "Delta 8 THC"  
#966 "Delta8-THC"  
#967 "Delta8 THC"  
#968 "Delta-8THC"  
#969 "Delta 8THC"  
#970 "Delta8THC"  
#971 "D 8-THC"  
#972 "D-8 THC"  
#973 "D 8 THC"  
#974 "D8THC"  
#975 " $\Delta$ -8-THC"  
#976 " $\Delta$  8-THC"  
#977 " $\Delta$ -8 THC"  
#978 " $\Delta$  8 THC"  
#979 " $\Delta$ 8-THC"  
#980 " $\Delta$ 8 THC"  
#981 " $\Delta$ -8THC"  
#982 " $\Delta$  8THC"  
#983 " $\Delta$ 8THC"  
#984 "anandamide"

#985 "N-arachidonylethanolamine"  
#986 "N arachidonylethanolamine"  
#987 "9-thc"  
#988 "9 thc"  
#989 "9thc"  
#990 "Delta-tetrahydrocannabinol"  
#991 "Delta tetrahydrocannabinol"  
#992 "Deltatetrahydrocannabinol"  
#993 "D-tetrahydrocannabinol"  
#994 "D tetrahydrocannabinol"  
#995 " $\Delta$ -tetrahydrocannabinol"  
#996 " $\Delta$  tetrahydrocannabinol"  
#997 " $\Delta$ tetrahydrocannabinol"  
#998 "Delta-THC"  
#999 "Delta THC"  
#1000 "DeltaTHC"  
#1001 "D-THC"  
#1002 "D THC"  
#1003 "DTHC"  
#1004 " $\Delta$ -THC"  
#1005 " $\Delta$  THC"  
#1006 " $\Delta$ THC"  
#1007 "11-Palmitoyloxy-d 9-tetrahydrocannabinol"  
#1008 "11-Palmitoyloxy- $\Delta$  9-tetrahydrocannabinol"  
#1009 "11-Palmitoyloxy-delta 9-THC"  
#1010 "11-Palmitoyloxy-d 9-THC"  
#1011 "11-Palmitoyloxy- $\Delta$  9-THC"  
#1012 "11-palm-d 9-thc"  
#1013 "11-palm- $\Delta$  9-thc"  
#1014 "11-palm-delta 9-tetrahydrocannabinol"  
#1015 "11-palm-d 9-tetrahydrocannabinol"  
#1016 "11-palm- $\Delta$  9-tetrahydrocannabinol"  
#1017 "cp55940"  
#1018 "cp-55940"  
#1019 "cp 55940"  
#1020 "CP-55,940"  
#1021 "CP 55,940"  
#1022 "11-oh-tetrahydrocannabinol"  
#1023 "11 oh-tetrahydrocannabinol"  
#1024 "11-oh tetrahydrocannabinol"  
#1025 "11 oh tetrahydrocannabinol"  
#1026 "11 ohtetrahydrocannabinol"  
#1027 "beta hhc"  
#1028 "beta-hhc"



#1029 " $\beta$ -hhc"  
#1030 " $\beta$  hhc"  
#1031 "b hhc"  
#1032 "bhhc"  
#1033 "beta-hydroxyhexahydrocannabinol"  
#1034 "beta hydroxyhexahydrocannabinol"  
#1035 " $\beta$ -hydroxyhexahydrocannabinol"  
#1036 " $\beta$  hydroxyhexahydrocannabinol"  
#1037 "b hydroxyhexahydrocannabinol"  
#1038 "hydroxyhexahydrocannabinol"  
#1039 "methanandamide"  
#1040 "AM-356"  
#1041 "AM356"  
#1042 "AM 356"  
#1043 "sr-141716-a"  
#1044 "sr 141716-a"  
#1045 "sr-141716 a"  
#1046 "sr 141716 a"  
#1047 "sr141716-a"  
#1048 "sr141716 a"  
#1049 "sr-141716a"  
#1050 "sr 141716a"  
#1051 "sr141716a"  
#1052 "Delta-9-Tetrahydrocannabutole"  
#1053 "Delta 9-Tetrahydrocannabutole"  
#1054 "Delta-9 Tetrahydrocannabutole"  
#1055 "Delta 9 Tetrahydrocannabutole"  
#1056 "Delta9-Tetrahydrocannabutole"  
#1057 "Delta9 Tetrahydrocannabutole"  
#1058 "Delta9Tetrahydrocannabutole"  
#1059 " $\Delta$ -9-Tetrahydrocannabutole"  
#1060 " $\Delta$  9-Tetrahydrocannabutole"  
#1061 " $\Delta$ -9 Tetrahydrocannabutole"  
#1062 " $\Delta$  9 Tetrahydrocannabutole"  
#1063 " $\Delta$ 9-Tetrahydrocannabutole"  
#1064 " $\Delta$ 9 Tetrahydrocannabutole"  
#1065 "Delta-9-THCB"  
#1066 "Delta 9-THCB"  
#1067 "Delta-9 THCB"  
#1068 "Delta 9 THCB"  
#1069 "Delta9 THCB"  
#1070 " $\Delta$ -9-THCB"  
#1071 " $\Delta$  9-THCB"  
#1072 " $\Delta$ -9 THCB"

#1073 " $\Delta$  9 THCB"  
#1074 " $\Delta$ 9 THCB"  
#1075 "CBDA"  
#1076 "HU-580"  
#1077 "HU 580"  
#1078 "CBDV"  
#1079 cannabidivarin\*  
#1080 "CP-47497"  
#1081 "CP 47497"  
#1082 "CP47497"  
#1083 "Trans-CCH"  
#1084 "cannabicyclohexanol"  
#1085 "Delta-(1)-tetrahydrocannabinolic acid"  
#1086 "Delta (1)-tetrahydrocannabinolic acid"  
#1087 "Delta-(1) tetrahydrocannabinolic acid"  
#1088 "Delta (1) tetrahydrocannabinolic acid"  
#1089 "Delta(1)-tetrahydrocannabinolic acid"  
#1090 "Delta(1) tetrahydrocannabinolic acid"  
#1091 "Delta-(1)tetrahydrocannabinolic acid"  
#1092 "Delta (1)tetrahydrocannabinolic acid"  
#1093 "Delta(1)tetrahydrocannabinolic acid"  
#1094 "Delta-1-tetrahydrocannabinolic acid"  
#1095 "Delta 1-tetrahydrocannabinolic acid"  
#1096 "Delta-1 tetrahydrocannabinolic acid"  
#1097 "Delta 1 tetrahydrocannabinolic acid"  
#1098 "Delta1-tetrahydrocannabinolic acid"  
#1099 "Delta1 tetrahydrocannabinolic acid"  
#1100 " $\Delta$ -(1)-tetrahydrocannabinolic acid"  
#1101 " $\Delta$  (1)-tetrahydrocannabinolic acid"  
#1102 " $\Delta$ -(1) tetrahydrocannabinolic acid"  
#1103 " $\Delta$  (1) tetrahydrocannabinolic acid"  
#1104 " $\Delta$ (1)-tetrahydrocannabinolic acid"  
#1105 " $\Delta$ (1) tetrahydrocannabinolic acid"  
#1106 " $\Delta$ -(1)tetrahydrocannabinolic acid"  
#1107 " $\Delta$  (1)tetrahydrocannabinolic acid"  
#1108 " $\Delta$ (1)tetrahydrocannabinolic acid"  
#1109 " $\Delta$ -1-tetrahydrocannabinolic acid"  
#1110 " $\Delta$  1-tetrahydrocannabinolic acid"  
#1111 " $\Delta$ -1 tetrahydrocannabinolic acid"  
#1112 " $\Delta$  1 tetrahydrocannabinolic acid"  
#1113 " $\Delta$ 1-tetrahydrocannabinolic acid"  
#1114 " $\Delta$ 1 tetrahydrocannabinolic acid"  
#1115 "D-(1)-tetrahydrocannabinolic acid"  
#1116 "D (1)-tetrahydrocannabinolic acid"

#1117 "D-(1) tetrahydrocannabinolic acid"  
#1118 "D (1) tetrahydrocannabinolic acid"  
#1119 "D(1)-tetrahydrocannabinolic acid"  
#1120 "D(1) tetrahydrocannabinolic acid"  
#1121 "D-(1)tetrahydrocannabinolic acid"  
#1122 "D (1)tetrahydrocannabinolic acid"  
#1123 "D(1)tetrahydrocannabinolic acid"  
#1124 "D-1 tetrahydrocannabinolic acid"  
#1125 "D 1 tetrahydrocannabinolic acid"  
#1126 "Delta-(1)-THCA"  
#1127 "Delta (1)-THCA"  
#1128 "Delta-(1) THCA"  
#1129 "Delta (1) THCA"  
#1130 "Delta(1)-THCA"  
#1131 "Delta(1) THCA"  
#1132 "Delta-(1)THCA"  
#1133 "Delta (1)THCA"  
#1134 "Delta(1)THCA"  
#1135 "Delta-1-THCA"  
#1136 "Delta 1-THCA"  
#1137 "Delta-1 THCA"  
#1138 "Delta 1 THCA"  
#1139 "Delta1 THCA"  
#1140 " $\Delta$ -(1)-THCA"  
#1141 " $\Delta$  (1)-THCA"  
#1142 " $\Delta$ -(1) THCA"  
#1143 " $\Delta$  (1) THCA"  
#1144 " $\Delta$ (1)-THCA"  
#1145 " $\Delta$ (1) THCA"  
#1146 " $\Delta$ -(1)THCA"  
#1147 " $\Delta$  (1)THCA"  
#1148 " $\Delta$ (1)THCA"  
#1149 " $\Delta$ -1-THCA"  
#1150 " $\Delta$  1-THCA"  
#1151 " $\Delta$ -1 THCA"  
#1152 " $\Delta$  1 THCA"  
#1153 " $\Delta$ 1 THCA"  
#1154 "D-(1)-THCA"  
#1155 "D (1)-THCA"  
#1156 "D-(1) THCA"  
#1157 "D (1) THCA"  
#1158 "D(1)-THCA"  
#1159 "D(1) THCA"  
#1160 "D-(1)THCA"

#1161 "D (1)THCA"  
#1162 "D(1)THCA"  
#1163 "D 1 THCA"  
#1164 THCA\*  
#1165 "Nor-9 $\beta$ -hydroxyhexahydrocannabinol"  
#1166 "Nor 9 $\beta$ -hydroxyhexahydrocannabinol"  
#1167 "Nor-9 $\beta$  hydroxyhexahydrocannabinol"  
#1168 "Nor 9 $\beta$  hydroxyhexahydrocannabinol"  
#1169 "Nor9 $\beta$  hydroxyhexahydrocannabinol"  
#1170 "9-beta-hydroxy-hexahydrocannabinol"  
#1171 "9-nor-9 $\beta$ -OH-HHC"  
#1172 "9-Nor-9 $\beta$ -hydroxyhexahydrocannabinol"  
#1173 "hash"  
#1174 "ganja"  
#1175 "bhang"  
#1176 OR/1-1175  
#1177 "Arthritis, Rheumatoid"[Mesh]  
#1178 "RA"  
#1179 rheumat\*  
#1180 reumat\*  
#1181 "super rheumatoid"  
#1182 antirheumat\*  
#1183 antireumat\*  
#1184 "anti-rheumatic"  
#1185 "anti-rheumatoid"  
#1186 "anti-reumatic"  
#1187 "anti-reumatoid"  
#1188 (("caplan's" OR "caplan" OR "felty's" OR "felty") AND (syndrom\* OR disease\*))  
#1189 "Felty Syndrome"[Mesh]  
#1190 "Caplan Syndrome"[Mesh]  
#1191 "Rheumatoid Nodule"[Mesh]  
#1192 OR/1177-1191  
#1193 randomized controlled trial [pt]  
#1194 controlled clinical trial [pt]  
#1195 randomized [tiab]  
#1196 placebo [tiab]  
#1197 drug therapy [sh]  
#1198 randomly [tiab]  
#1199 trial [tiab]  
#1200 groups [tiab]  
#1201 OR/1193-1200  
#1202 (animals [mh] NOT humans [mh])  
#1203 #1201 NOT #1202  
#1204 #1176 AND #1192 AND #1203

**CENTRAL (Wiley) search strategy**

- #1 MeSH descriptor: [Marijuana Smoking] explode all trees
- #2 MeSH descriptor: [Marijuana Use] explode all trees
- #3 MeSH descriptor: [Dronabinol] explode all trees
- #4 MeSH descriptor: [Cannabinoids] explode all trees
- #5 MeSH descriptor: [Cannabis] explode all trees
- #6 MeSH descriptor: [Medical Marijuana] explode all trees
- #7 MeSH descriptor: [Cannabaceae] explode all trees
- #8 MeSH descriptor: [Endocannabinoids] explode all trees
- #9 (cannabi\*) (Word variations have been searched)
- #10 ("cannabaceae") (Word variations have been searched)
- #11 (marijuan\*) (Word variations have been searched)
- #12 (marihuan\*) (Word variations have been searched)
- #13 ("sativa") (Word variations have been searched)
- #14 (phytocannabinoid\*) (Word variations have been searched)
- #15 (CBD\*) (Word variations have been searched)
- #16 ("Epidiolex") (Word variations have been searched)
- #17 ("ZYN002") (Word variations have been searched)
- #18 (nabiximol\*) (Word variations have been searched)
- #19 ("Sativex") (Word variations have been searched)
- #20 (tetrahydrocannab\*) (Word variations have been searched)
- #21 ("THC") (Word variations have been searched)
- #22 (endocannabinoid\*) (Word variations have been searched)
- #23 ("Delta-9-tetrahydrocannabinol") (Word variations have been searched)
- #24 ("Delta 9-tetrahydrocannabinol") (Word variations have been searched)
- #25 ("Delta-9 tetrahydrocannabinol") (Word variations have been searched)
- #26 ("Delta 9 tetrahydrocannabinol") (Word variations have been searched)
- #27 ("Delta9-tetrahydrocannabinol") (Word variations have been searched)
- #28 ("Delta9 tetrahydrocannabinol") (Word variations have been searched)
- #29 ("Delta9tetrahydrocannabinol") (Word variations have been searched)
- #30 ("Delta-9tetrahydrocannabinol") (Word variations have been searched)
- #31 ("Delta 9tetrahydrocannabinol") (Word variations have been searched)
- #32 ("D-9-tetrahydrocannabinol") (Word variations have been searched)
- #33 ("D 9-tetrahydrocannabinol") (Word variations have been searched)
- #34 ("D-9 tetrahydrocannabinol") (Word variations have been searched)
- #35 ("D 9 tetrahydrocannabinol") (Word variations have been searched)
- #36 ("D9-tetrahydrocannabinol") (Word variations have been searched)
- #37 ("D9 tetrahydrocannabinol") (Word variations have been searched)
- #38 ("Δ-9-tetrahydrocannabinol") (Word variations have been searched)
- #39 ("Δ 9-tetrahydrocannabinol") (Word variations have been searched)
- #40 ("Δ-9 tetrahydrocannabinol") (Word variations have been searched)
- #41 ("Δ 9 tetrahydrocannabinol") (Word variations have been searched)
- #42 ("Δ9-tetrahydrocannabinol") (Word variations have been searched)

- #43 ("Δ9 tetrahydrocannabinol") (Word variations have been searched)
- #44 ("Δ-9tetrahydrocannabinol") (Word variations have been searched)
- #45 ("Δ 9tetrahydrocannabinol") (Word variations have been searched)
- #46 ("Δ9tetrahydrocannabinol") (Word variations have been searched)
- #47 ("9-tetrahydrocannabinol") (Word variations have been searched)
- #48 ("9 tetrahydrocannabinol") (Word variations have been searched)
- #49 ("9tetrahydrocannabinol") (Word variations have been searched)
- #50 ("Delta-9-THC") (Word variations have been searched)
- #51 ("Delta 9-THC") (Word variations have been searched)
- #52 ("Delta-9 THC") (Word variations have been searched)
- #53 ("Delta 9 THC") (Word variations have been searched)
- #54 ("Delta9-THC") (Word variations have been searched)
- #55 ("Delta9 THC") (Word variations have been searched)
- #56 ("Delta9THC") (Word variations have been searched)
- #57 ("Delta-9THC") (Word variations have been searched)
- #58 ("Delta 9THC") (Word variations have been searched)
- #59 ("D-9-THC") (Word variations have been searched)
- #60 ("D 9-THC") (Word variations have been searched)
- #61 ("D-9 THC") (Word variations have been searched)
- #62 ("D 9 THC") (Word variations have been searched)
- #63 ("D9-THC") (Word variations have been searched)
- #64 ("D9 THC") (Word variations have been searched)
- #65 ("D 9THC") (Word variations have been searched)
- #66 ("D9THC") (Word variations have been searched)
- #67 ("Δ-9-THC") (Word variations have been searched)
- #68 ("Δ 9-THC") (Word variations have been searched)
- #69 ("Δ-9 THC") (Word variations have been searched)
- #70 ("Δ 9 THC") (Word variations have been searched)
- #71 ("Δ9-THC") (Word variations have been searched)
- #72 ("Δ9 THC") (Word variations have been searched)
- #73 ("Δ-9THC") (Word variations have been searched)
- #74 ("Δ 9THC") (Word variations have been searched)
- #75 ("Δ9THC") (Word variations have been searched)
- #76 ("Trans delta-9-tetrahydrocannabinol") (Word variations have been searched)
- #77 ("Trans-delta 9-tetrahydrocannabinol") (Word variations have been searched)
- #78 ("Trans-delta-9 tetrahydrocannabinol") (Word variations have been searched)
- #79 ("Trans delta 9 tetrahydrocannabinol") (Word variations have been searched)
- #80 ("Trans delta-9 tetrahydrocannabinol") (Word variations have been searched)
- #81 ("Trans-delta 9 tetrahydrocannabinol") (Word variations have been searched)
- #82 ("Trans delta 9-tetrahydrocannabinol") (Word variations have been searched)
- #83 ("Transdelta-9 tetrahydrocannabinol") (Word variations have been searched)
- #84 ("Transdelta 9-tetrahydrocannabinol") (Word variations have been searched)
- #85 ("Transdelta 9 tetrahydrocannabinol") (Word variations have been searched)
- #86 ("Trans-delta9-tetrahydrocannabinol") (Word variations have been searched)

#87 ("Trans delta9-tetrahydrocannabinol") (Word variations have been searched)  
#88 ("Trans-delta9 tetrahydrocannabinol") (Word variations have been searched)  
#89 ("Trans delta9 tetrahydrocannabinol") (Word variations have been searched)  
#90 ("Transdelta 9tetrahydrocannabinol") (Word variations have been searched)  
#91 ("Trans-d-9 tetrahydrocannabinol") (Word variations have been searched)  
#92 ("Transd-9 tetrahydrocannabinol") (Word variations have been searched)  
#93 ("Trans-d9 tetrahydrocannabinol") (Word variations have been searched)  
#94 ("Transd9 tetrahydrocannabinol") (Word variations have been searched)  
#95 ("Trans Δ-9-tetrahydrocannabinol") (Word variations have been searched)  
#96 ("Trans-Δ 9-tetrahydrocannabinol") (Word variations have been searched)  
#97 ("Trans-Δ-9 tetrahydrocannabinol") (Word variations have been searched)  
#98 ("Trans Δ 9 tetrahydrocannabinol") (Word variations have been searched)  
#99 ("Trans Δ-9 tetrahydrocannabinol") (Word variations have been searched)  
#100 ("Trans-Δ 9 tetrahydrocannabinol") (Word variations have been searched)  
#101 ("Trans Δ 9-tetrahydrocannabinol") (Word variations have been searched)  
#102 ("TransΔ 9-tetrahydrocannabinol") (Word variations have been searched)  
#103 ("TransΔ-9 tetrahydrocannabinol") (Word variations have been searched)  
#104 ("TransΔ 9 tetrahydrocannabinol") (Word variations have been searched)  
#105 ("Trans-Δ9-tetrahydrocannabinol") (Word variations have been searched)  
#106 ("Trans Δ9-tetrahydrocannabinol") (Word variations have been searched)  
#107 ("Trans-Δ9 tetrahydrocannabinol") (Word variations have been searched)  
#108 ("Trans Δ9 tetrahydrocannabinol") (Word variations have been searched)  
#109 ("TransΔ 9tetrahydrocannabinol") (Word variations have been searched)  
#110 ("Trans delta-9-THC") (Word variations have been searched)  
#111 ("Trans-delta 9-THC") (Word variations have been searched)  
#112 ("Trans-delta-9 THC") (Word variations have been searched)  
#113 ("Trans delta 9 THC") (Word variations have been searched)  
#114 ("Trans delta-9 THC") (Word variations have been searched)  
#115 ("Trans-delta 9 THC") (Word variations have been searched)  
#116 ("Trans delta 9-THC") (Word variations have been searched)  
#117 ("Transdelta 9-THC") (Word variations have been searched)  
#118 ("Transdelta-9 THC") (Word variations have been searched)  
#119 ("Transdelta 9 THC") (Word variations have been searched)  
#120 ("Trans delta9-THC") (Word variations have been searched)  
#121 ("Trans-delta9 THC") (Word variations have been searched)  
#122 ("Trans delta9 THC") (Word variations have been searched)  
#123 ("Trans delta-9THC") (Word variations have been searched)  
#124 ("Trans delta 9THC") (Word variations have been searched)  
#125 ("Transdelta 9THC") (Word variations have been searched)  
#126 ("Trans delta9THC") (Word variations have been searched)  
#127 ("Trans-d-9 THC") (Word variations have been searched)  
#128 ("Transd-9 THC") (Word variations have been searched)  
#129 ("Trans-d9 THC") (Word variations have been searched)  
#130 ("Transd9 THC") (Word variations have been searched)

- #131 ("Trans- $\Delta$ -9-THC") (Word variations have been searched)
- #132 ("Trans  $\Delta$ -9-THC") (Word variations have been searched)
- #133 ("Trans- $\Delta$  9-THC") (Word variations have been searched)
- #134 ("Trans- $\Delta$ -9 THC") (Word variations have been searched)
- #135 ("Trans  $\Delta$  9 THC") (Word variations have been searched)
- #136 ("Trans  $\Delta$ -9 THC") (Word variations have been searched)
- #137 ("Trans- $\Delta$  9 THC") (Word variations have been searched)
- #138 ("Trans  $\Delta$  9-THC") (Word variations have been searched)
- #139 ("Trans $\Delta$  9-THC") (Word variations have been searched)
- #140 ("Trans $\Delta$ -9 THC") (Word variations have been searched)
- #141 ("Trans $\Delta$  9 THC") (Word variations have been searched)
- #142 ("Trans  $\Delta$ 9-THC") (Word variations have been searched)
- #143 ("Trans- $\Delta$ 9 THC") (Word variations have been searched)
- #144 ("Trans  $\Delta$ 9 THC") (Word variations have been searched)
- #145 ("Trans  $\Delta$ -9THC") (Word variations have been searched)
- #146 ("Trans  $\Delta$  9THC") (Word variations have been searched)
- #147 ("Trans  $\Delta$ 9THC") (Word variations have been searched)
- #148 ("Trans $\Delta$  9THC") (Word variations have been searched)
- #149 (Dronabinol\*) (Word variations have been searched)
- #150 ("Marinol") (Word variations have been searched)
- #151 ("THCV") (Word variations have been searched)
- #152 (Nabilo\*) (Word variations have been searched)
- #153 ("Cesamet") (Word variations have been searched)
- #154 ("Canemes") (Word variations have been searched)
- #155 ("Levonantradol") (Word variations have been searched)
- #156 ("Delta-1-tetrahydrocannabinol") (Word variations have been searched)
- #157 ("Delta 1-tetrahydrocannabinol") (Word variations have been searched)
- #158 ("Delta-1 tetrahydrocannabinol") (Word variations have been searched)
- #159 ("Delta 1 tetrahydrocannabinol") (Word variations have been searched)
- #160 ("Delta1-tetrahydrocannabinol") (Word variations have been searched)
- #161 ("Delta1 tetrahydrocannabinol") (Word variations have been searched)
- #162 ("Delta-1tetrahydrocannabinol") (Word variations have been searched)
- #163 ("Delta 1tetrahydrocannabinol") (Word variations have been searched)
- #164 ("D 1-tetrahydrocannabinol") (Word variations have been searched)
- #165 ("D-1 tetrahydrocannabinol") (Word variations have been searched)
- #166 ("D 1 tetrahydrocannabinol") (Word variations have been searched)
- #167 ("D1 tetrahydrocannabinol") (Word variations have been searched)
- #168 (" $\Delta$ -1-tetrahydrocannabinol") (Word variations have been searched)
- #169 (" $\Delta$  1-tetrahydrocannabinol") (Word variations have been searched)
- #170 (" $\Delta$ -1 tetrahydrocannabinol") (Word variations have been searched)
- #171 (" $\Delta$  1 tetrahydrocannabinol") (Word variations have been searched)
- #172 (" $\Delta$ 1-tetrahydrocannabinol") (Word variations have been searched)
- #173 (" $\Delta$ 1 tetrahydrocannabinol") (Word variations have been searched)
- #174 (" $\Delta$ -1tetrahydrocannabinol") (Word variations have been searched)



#175 ("Δ 1tetrahydrocannabinol") (Word variations have been searched)  
#176 ("1-tetrahydrocannabinol") (Word variations have been searched)  
#177 ("1 tetrahydrocannabinol") (Word variations have been searched)  
#178 ("1tetrahydrocannabinol") (Word variations have been searched)  
#179 ("1-THC") (Word variations have been searched)  
#180 ("1 THC") (Word variations have been searched)  
#181 ("Delta-1-THC") (Word variations have been searched)  
#182 ("Delta 1-THC") (Word variations have been searched)  
#183 ("Delta-1 THC") (Word variations have been searched)  
#184 ("Delta 1 THC") (Word variations have been searched)  
#185 ("Delta1-THC") (Word variations have been searched)  
#186 ("Delta1 THC") (Word variations have been searched)  
#187 ("Delta1THC") (Word variations have been searched)  
#188 ("D 1-THC") (Word variations have been searched)  
#189 ("D-1 THC") (Word variations have been searched)  
#190 ("D 1 THC") (Word variations have been searched)  
#191 ("D1 THC") (Word variations have been searched)  
#192 ("Δ-1-THC") (Word variations have been searched)  
#193 ("Δ 1-THC") (Word variations have been searched)  
#194 ("Δ-1 THC") (Word variations have been searched)  
#195 ("Δ 1 THC") (Word variations have been searched)  
#196 ("Δ1-THC") (Word variations have been searched)  
#197 ("Δ1 THC") (Word variations have been searched)  
#198 ("Δ1THC") (Word variations have been searched)  
#199 (Ajulemic\*) (Word variations have been searched)  
#200 ("JBT-101") (Word variations have been searched)  
#201 ("anabasum") (Word variations have been searched)  
#202 ("Lenabasum") (Word variations have been searched)  
#203 ("Resunab") (Word variations have been searched)  
#204 ("GW842166") (Word variations have been searched)  
#205 ("AZD1940") (Word variations have been searched)  
#206 ("FAAH") (Word variations have been searched)  
#207 ("PF04457845") (Word variations have been searched)  
#208 ("PF-04457845") (Word variations have been searched)  
#209 ("PF 04457845") (Word variations have been searched)  
#210 ("fatty acid amide") (Word variations have been searched)  
#211 ("fatty-acid amide") (Word variations have been searched)  
#212 ("fatty-acid-amide") (Word variations have been searched)  
#213 ("amidohydrolase") (Word variations have been searched)  
#214 ("hemp") (Word variations have been searched)  
#215 ("THC:CBD") (Word variations have been searched)  
#216 ("CBD:THC") (Word variations have been searched)  
#217 (echinacea\*) (Word variations have been searched)  
#218 ("JWH 071") (Word variations have been searched)

#219 ("JWH-018-Br") (Word variations have been searched)  
#220 ("JWH 018-Br") (Word variations have been searched)  
#221 ("JWH-018 Br") (Word variations have been searched)  
#222 ("JWH 018 Br") (Word variations have been searched)  
#223 ("JWH018 Br") (Word variations have been searched)  
#224 ("JWH-018Br") (Word variations have been searched)  
#225 ("JWH 018Br") (Word variations have been searched)  
#226 ("JWH-018-CI") (Word variations have been searched)  
#227 ("JWH 018-CI") (Word variations have been searched)  
#228 ("JWH-018 CI") (Word variations have been searched)  
#229 ("JWH 018 CI") (Word variations have been searched)  
#230 ("JWH018 CI") (Word variations have been searched)  
#231 ("JWH 018CI") (Word variations have been searched)  
#232 ("JWH-007") (Word variations have been searched)  
#233 ("JWH007") (Word variations have been searched)  
#234 ("JWH 007") (Word variations have been searched)  
#235 ("JWH-203") (Word variations have been searched)  
#236 ("JWH203") (Word variations have been searched)  
#237 ("JWH 203") (Word variations have been searched)  
#238 ("JWH-250") (Word variations have been searched)  
#239 ("JWH250") (Word variations have been searched)  
#240 ("JWH 250") (Word variations have been searched)  
#241 ("JWH-398") (Word variations have been searched)  
#242 ("JWH 398") (Word variations have been searched)  
#243 ("7'N-5F-ADB") (Word variations have been searched)  
#244 ("7'N 5F-ADB") (Word variations have been searched)  
#245 ("7'N-5F ADB") (Word variations have been searched)  
#246 ("7'N 5F ADB") (Word variations have been searched)  
#247 ("7'N 5FADB") (Word variations have been searched)  
#248 ("ADB-CHMINACA") (Word variations have been searched)  
#249 ("MAB-CHMINACA") (Word variations have been searched)  
#250 ("MAB CHMINACA") (Word variations have been searched)  
#251 ("MN-18") (Word variations have been searched)  
#252 ("MN18") (Word variations have been searched)  
#253 ("5F-MN-18") (Word variations have been searched)  
#254 ("5F MN-18") (Word variations have been searched)  
#255 ("5F-MN 18") (Word variations have been searched)  
#256 ("5F MN 18") (Word variations have been searched)  
#257 ("5FMN 18") (Word variations have been searched)  
#258 ("CBL(N)2201") (Word variations have been searched)  
#259 ("MDMB(N)-BZ-F") (Word variations have been searched)  
#260 ("MDMB(N) BZ-F") (Word variations have been searched)  
#261 ("MDMB(N)-BZ F") (Word variations have been searched)  
#262 ("MDMB(N)BZ-F") (Word variations have been searched)

#263 ("MDMB(N)BZ F") (Word variations have been searched)  
#264 ("FU AEB") (Word variations have been searched)  
#265 ("5F EMB-FUBINACA") (Word variations have been searched)  
#266 ("5F-EMB FUBINACA") (Word variations have been searched)  
#267 ("5F EMB FUBINACA") (Word variations have been searched)  
#268 ("5FEMB FUBINACA") (Word variations have been searched)  
#269 ("FUB AMB-Ethylester") (Word variations have been searched)  
#270 ("ADAMANTYL CHMINACA") (Word variations have been searched)  
#271 ("5F JWH-018-N") (Word variations have been searched)  
#272 ("5F JWH 018 N") (Word variations have been searched)  
#273 ("5F JWH-018 N") (Word variations have been searched)  
#274 ("5F JWH 018-N") (Word variations have been searched)  
#275 ("5F JWH018 N") (Word variations have been searched)  
#276 ("5FJWH 018N") (Word variations have been searched)  
#277 ("5F THJ-018") (Word variations have been searched)  
#278 ("5F-THJ 018") (Word variations have been searched)  
#279 ("5F THJ 018") (Word variations have been searched)  
#280 ("5FTHJ 018") (Word variations have been searched)  
#281 ("THJ-2201") (Word variations have been searched)  
#282 ("THJ 2201") (Word variations have been searched)  
#283 ("5CI-THJ-018") (Word variations have been searched)  
#284 ("5CI THJ-018") (Word variations have been searched)  
#285 ("5CI-THJ 018") (Word variations have been searched)  
#286 ("5CI THJ 018") (Word variations have been searched)  
#287 ("5CITHJ 018") (Word variations have been searched)  
#288 ("5CI JWH 018-N") (Word variations have been searched)  
#289 ("5CI JWH018-N") (Word variations have been searched)  
#290 ("5CI-JWH 018N") (Word variations have been searched)  
#291 ("5CI JWH-018N") (Word variations have been searched)  
#292 ("5CI JWH018N") (Word variations have been searched)  
#293 ("5CIJWH 018N") (Word variations have been searched)  
#294 ("THJ-018") (Word variations have been searched)  
#295 ("THJ 018") (Word variations have been searched)  
#296 ("MDMB-N-2201") (Word variations have been searched)  
#297 ("MDMB N-2201") (Word variations have been searched)  
#298 ("MDMB-N 2201") (Word variations have been searched)  
#299 ("MDMB N 2201") (Word variations have been searched)  
#300 ("MDMB-(N)-2201") (Word variations have been searched)  
#301 ("MDMB (N)-2201") (Word variations have been searched)  
#302 ("MDMB-(N) 2201") (Word variations have been searched)  
#303 ("MDMB (N) 2201") (Word variations have been searched)  
#304 ("MDMB(N)-2201") (Word variations have been searched)  
#305 ("MDMB(N) 2201") (Word variations have been searched)  
#306 ("MDMB-(N)2201") (Word variations have been searched)

- #307 ("MDMB (N)2201") (Word variations have been searched)
- #308 ("MDMB(N)2201") (Word variations have been searched)
- #309 ("4F-MDMB-BINACA") (Word variations have been searched)
- #310 ("4F MDMB-BINACA") (Word variations have been searched)
- #311 ("4F-MDMB BINACA") (Word variations have been searched)
- #312 ("4F MDMB BINACA") (Word variations have been searched)
- #313 ("4FMDMB BINACA") (Word variations have been searched)
- #314 ("MN-24") (Word variations have been searched)
- #315 ("MN24") (Word variations have been searched)
- #316 ("MN 24") (Word variations have been searched)
- #317 ("SDB-001") (Word variations have been searched)
- #318 ("SDB 001") (Word variations have been searched)
- #319 ("MMB-CHMICA") (Word variations have been searched)
- #320 ("MMB CHMICA") (Word variations have been searched)
- #321 ("NNL-3") (Word variations have been searched)
- #322 ("NNL 3") (Word variations have been searched)
- #323 ("AKB-48") (Word variations have been searched)
- #324 ("AKB48") (Word variations have been searched)
- #325 ("AKB 48") (Word variations have been searched)
- #326 ("5F-AKB-48") (Word variations have been searched)
- #327 ("5F AKB-48") (Word variations have been searched)
- #328 ("5F-AKB 48") (Word variations have been searched)
- #329 ("5F AKB 48") (Word variations have been searched)
- #330 ("5FAKB-48") (Word variations have been searched)
- #331 ("5FAKB 48") (Word variations have been searched)
- #332 ("5F-AKB48") (Word variations have been searched)
- #333 ("5F AKB48") (Word variations have been searched)
- #334 ("CP-47,497") (Word variations have been searched)
- #335 ("CP 47,497") (Word variations have been searched)
- #336 ("CP47,497") (Word variations have been searched)
- #337 ("(C7)-CP-47,497") (Word variations have been searched)
- #338 ("(C7) CP-47,497") (Word variations have been searched)
- #339 ("(C7)-CP 47,497") (Word variations have been searched)
- #340 ("(C7) CP 47,497") (Word variations have been searched)
- #341 ("(C7)CP-47,497") (Word variations have been searched)
- #342 ("(C7)CP 47,497") (Word variations have been searched)
- #343 ("3-[2-hydroxy-4-(2-methyloctan-2-yl)phenyl]cyclohexan-1-ol") (Word variations have been searched)
- #344 ("CP-47,497-C8") (Word variations have been searched)
- #345 ("CP 47,497-C8") (Word variations have been searched)
- #346 ("CP-47,497 C8") (Word variations have been searched)
- #347 ("CP 47,497 C8") (Word variations have been searched)
- #348 ("CP47,497-C8") (Word variations have been searched)
- #349 ("CP47,497 C8") (Word variations have been searched)

#350 ("CP-47,497C8") (Word variations have been searched)  
#351 ("CP47,497C8") (Word variations have been searched)  
#352 ("5F-APINACA") (Word variations have been searched)  
#353 ("5F APINACA") (Word variations have been searched)  
#354 ("A PINACA") (Word variations have been searched)  
#355 ("APINACA") (Word variations have been searched)  
#356 ("SGT 263") (Word variations have been searched)  
#357 ("PX-2") (Word variations have been searched)  
#358 ("PX 2") (Word variations have been searched)  
#359 ("PX2") (Word variations have been searched)  
#360 ("PX-3") (Word variations have been searched)  
#361 ("PX 3") (Word variations have been searched)  
#362 ("PX3") (Word variations have been searched)  
#363 ("5F-SDB-005") (Word variations have been searched)  
#364 ("5F SDB-005") (Word variations have been searched)  
#365 ("5F-SDB 005") (Word variations have been searched)  
#366 ("5F SDB 005") (Word variations have been searched)  
#367 ("5FSDB 005") (Word variations have been searched)  
#368 ("CUMYL-4CN-B7AICA") (Word variations have been searched)  
#369 ("CUMYL 4CN-B7AICA") (Word variations have been searched)  
#370 ("CUMYL-4CN B7AICA") (Word variations have been searched)  
#371 ("CUMYL 4CN B7AICA") (Word variations have been searched)  
#372 ("CUMYL4CN B7AICA") (Word variations have been searched)  
#373 ("CUMYL 4CNB7AICA") (Word variations have been searched)  
#374 ("CUMYL 5F-P7AICA") (Word variations have been searched)  
#375 ("CUMYL-5F P7AICA") (Word variations have been searched)  
#376 ("CUMYL5F P7AICA") (Word variations have been searched)  
#377 ("CUMYL 5FP7AICA") (Word variations have been searched)  
#378 ("5F-AB-P7AICA") (Word variations have been searched)  
#379 ("5F AB-P7AICA") (Word variations have been searched)  
#380 ("5F-AB P7AICA") (Word variations have been searched)  
#381 ("5F AB P7AICA") (Word variations have been searched)  
#382 ("5FAB P7AICA") (Word variations have been searched)  
#383 ("5F-MDMB-P7AICA") (Word variations have been searched)  
#384 ("5F MDMB-P7AICA") (Word variations have been searched)  
#385 ("5F-MDMB P7AICA") (Word variations have been searched)  
#386 ("5F MDMB P7AICA") (Word variations have been searched)  
#387 ("5FMDMB P7AICA") (Word variations have been searched)  
#388 ("MDMB PCZCA") (Word variations have been searched)  
#389 ("DMBA-CHMINACA") (Word variations have been searched)  
#390 ("DMBA CHMINACA") (Word variations have been searched)  
#391 ("A THPINACA") (Word variations have been searched)  
#392 ("ADAMANTYL-THPINACA") (Word variations have been searched)  
#393 ("ADAMANTYL THPINACA") (Word variations have been searched)

#394 ("2F-AB PINACA") (Word variations have been searched)  
#395 ("APP FUBINACA") (Word variations have been searched)  
#396 ("5CI-MDMB PINACA") (Word variations have been searched)  
#397 ("5CI MDMB PINACA") (Word variations have been searched)  
#398 ("5CIMDMB PINACA") (Word variations have been searched)  
#399 ("5CI MDMBPINACA") (Word variations have been searched)  
#400 ("5CI ADB") (Word variations have been searched)  
#401 ("5F-ADB-PINACA") (Word variations have been searched)  
#402 ("5F ADB-PINACA") (Word variations have been searched)  
#403 ("5F-ADB PINACA") (Word variations have been searched)  
#404 ("5F ADB PINACA") (Word variations have been searched)  
#405 ("5FADB PINACA") (Word variations have been searched)  
#406 ("5F-APP PINACA") (Word variations have been searched)  
#407 ("5F APP PINACA") (Word variations have been searched)  
#408 ("5FAPP PINACA") (Word variations have been searched)  
#409 ("5F-AMB-PINACA") (Word variations have been searched)  
#410 ("5F AMB-PINACA") (Word variations have been searched)  
#411 ("5F-AMB PINACA") (Word variations have been searched)  
#412 ("5F AMB PINACA") (Word variations have been searched)  
#413 ("5FAMB PINACA") (Word variations have been searched)  
#414 ("MO CHMINACA") (Word variations have been searched)  
#415 ("MO AMB") (Word variations have been searched)  
#416 ("MOAMB") (Word variations have been searched)  
#417 ("MDMB CHMINAC") (Word variations have been searched)  
#418 ("CUMYL-PINACA") (Word variations have been searched)  
#419 ("CUMYL PINACA") (Word variations have been searched)  
#420 ("5F-EMB-PINACA") (Word variations have been searched)  
#421 ("5F EMB-PINACA") (Word variations have been searched)  
#422 ("5F-EMB PINACA") (Word variations have been searched)  
#423 ("5F EMB PINACA") (Word variations have been searched)  
#424 ("5FEMB PINACA") (Word variations have been searched)  
#425 ("AB-FUBINACA") (Word variations have been searched)  
#426 ("AB FUBINACA") (Word variations have been searched)  
#427 ("APP-CHMINACA") (Word variations have been searched)  
#428 ("APP CHMINACA") (Word variations have been searched)  
#429 ("4 CN-CUMYL-BINACA") (Word variations have been searched)  
#430 ("4-CN-CUMYL BINACA") (Word variations have been searched)  
#431 ("4 CN-CUMYL BINACA") (Word variations have been searched)  
#432 ("4CN CUMYL-BINACA") (Word variations have been searched)  
#433 ("4CN-CUMYL BINACA") (Word variations have been searched)  
#434 ("4CN CUMYL BINACA") (Word variations have been searched)  
#435 ("4 CNCUMYL-BINACA") (Word variations have been searched)  
#436 ("4-CNCUMYL BINACA") (Word variations have been searched)  
#437 ("4 CNCUMYL BINACA") (Word variations have been searched)

#438 ("4 CN-CUMYLBINACA") (Word variations have been searched)  
#439 ("4-CN CUMYLBINACA") (Word variations have been searched)  
#440 ("4CNCUMYL BINACA") (Word variations have been searched)  
#441 ("4 CNCUMYLBINACA") (Word variations have been searched)  
#442 ("4CN CUMYLBINACA") (Word variations have been searched)  
#443 ("CUMYL CB-PINACA") (Word variations have been searched)  
#444 ("CUMYL-CB PINACA") (Word variations have been searched)  
#445 ("CUMYLCB PINACA") (Word variations have been searched)  
#446 ("CUMYL CBPINACA") (Word variations have been searched)  
#447 ("CUMYL CY-BINACA") (Word variations have been searched)  
#448 ("CUMYL-CY BINACA") (Word variations have been searched)  
#449 ("CUMYLCY BINACA") (Word variations have been searched)  
#450 ("CUMYL CYBINACA") (Word variations have been searched)  
#451 ("SDB-005") (Word variations have been searched)  
#452 ("SDB 005") (Word variations have been searched)  
#453 ("SGT 78") (Word variations have been searched)  
#454 ("A CHMINACA") (Word variations have been searched)  
#455 ("MDMB-4en-PINACA") (Word variations have been searched)  
#456 ("MDMB 4en-PINACA") (Word variations have been searched)  
#457 ("MDMB-4en PINACA") (Word variations have been searched)  
#458 ("MDMB 4en PINACA") (Word variations have been searched)  
#459 ("MDMB4en PINACA") (Word variations have been searched)  
#460 ("MDMB 4enPINACA") (Word variations have been searched)  
#461 ("CUMYL-4CN-BINACA") (Word variations have been searched)  
#462 ("CUMYL 4CN-BINACA") (Word variations have been searched)  
#463 ("CUMYL-4CN BINACA") (Word variations have been searched)  
#464 ("CUMYL 4CN BINACA") (Word variations have been searched)  
#465 ("CUMYL4CN BINACA") (Word variations have been searched)  
#466 ("CUMYL 4CNBINACA") (Word variations have been searched)  
#467 ("5F-CUMYL-PINACA") (Word variations have been searched)  
#468 ("5F CUMYL-PINACA") (Word variations have been searched)  
#469 ("5F-CUMYL PINACA") (Word variations have been searched)  
#470 ("5F CUMYL PINACA") (Word variations have been searched)  
#471 ("5FCUMYL PINACA") (Word variations have been searched)  
#472 ("CUMYL-5F-PINACA") (Word variations have been searched)  
#473 ("CUMYL 5F-PINACA") (Word variations have been searched)  
#474 ("CUMYL-5F PINACA") (Word variations have been searched)  
#475 ("CUMYL 5F PINACA") (Word variations have been searched)  
#476 ("CUMYL5F PINACA") (Word variations have been searched)  
#477 ("CUMYL 5FPINACA") (Word variations have been searched)  
#478 ("5CI-AB-PINACA") (Word variations have been searched)  
#479 ("5CI AB-PINACA") (Word variations have been searched)  
#480 ("5CI-AB PINACA") (Word variations have been searched)  
#481 ("5CI AB PINACA") (Word variations have been searched)

#482 ("5CIAB PINACA") (Word variations have been searched)  
#483 ("ADB-FUBINACA") (Word variations have been searched)  
#484 ("ADB FUBINACA") (Word variations have been searched)  
#485 ("ADB-PINACA") (Word variations have been searched)  
#486 ("ADB PINACA") (Word variations have been searched)  
#487 ("5F-PY-PINACA") (Word variations have been searched)  
#488 ("5F PY-PINACA") (Word variations have been searched)  
#489 ("5F-PY PINACA") (Word variations have been searched)  
#490 ("5F PY PINACA") (Word variations have been searched)  
#491 ("5CI UR-144") (Word variations have been searched)  
#492 ("5CI-UR 144") (Word variations have been searched)  
#493 ("5CI UR 144") (Word variations have been searched)  
#494 ("5CIUR 144") (Word variations have been searched)  
#495 ("FDU-PB-22") (Word variations have been searched)  
#496 ("FDU PB-22") (Word variations have been searched)  
#497 ("FDU-PB 22") (Word variations have been searched)  
#498 ("FDU PB 22") (Word variations have been searched)  
#499 ("FDUPB 22") (Word variations have been searched)  
#500 ("NNEI") (Word variations have been searched)  
#501 ("AM XIAO") (Word variations have been searched)  
#502 ("AM-679") (Word variations have been searched)  
#503 ("AM 679") (Word variations have been searched)  
#504 ("AM679") (Word variations have been searched)  
#505 ("AM-694") (Word variations have been searched)  
#506 ("AM 694") (Word variations have been searched)  
#507 ("AM694") (Word variations have been searched)  
#508 ("JWH 387") (Word variations have been searched)  
#509 ("WIN 48,098") (Word variations have been searched)  
#510 ("WIN48,098") (Word variations have been searched)  
#511 ("AM-2232") (Word variations have been searched)  
#512 ("AM 2232") (Word variations have been searched)  
#513 ("JWH-019") (Word variations have been searched)  
#514 ("JWH019") (Word variations have been searched)  
#515 ("JWH 019") (Word variations have been searched)  
#516 ("JWH-022") (Word variations have been searched)  
#517 ("JWH 022") (Word variations have been searched)  
#518 ("JWH-081") (Word variations have been searched)  
#519 ("JWH081") (Word variations have been searched)  
#520 ("JWH 081") (Word variations have been searched)  
#521 ("F2201") (Word variations have been searched)  
#522 ("JWH-412") (Word variations have been searched)  
#523 ("JWH 412") (Word variations have been searched)  
#524 ("UR-144") (Word variations have been searched)  
#525 ("UR144") (Word variations have been searched)



#526 ("UR 144") (Word variations have been searched)  
#527 ("AM-2233") (Word variations have been searched)  
#528 ("AM2233") (Word variations have been searched)  
#529 ("AM 2233") (Word variations have been searched)  
#530 ("EAM-2201") (Word variations have been searched)  
#531 ("EAM2201") (Word variations have been searched)  
#532 ("EAM 2201") (Word variations have been searched)  
#533 ("JWH-210") (Word variations have been searched)  
#534 ("JWH 210") (Word variations have been searched)  
#535 ("JWH-015") (Word variations have been searched)  
#536 ("JWH015") (Word variations have been searched)  
#537 ("JWH 015") (Word variations have been searched)  
#538 ("AB-001") (Word variations have been searched)  
#539 ("AB001") (Word variations have been searched)  
#540 ("AB 001") (Word variations have been searched)  
#541 ("JWH-251") (Word variations have been searched)  
#542 ("JWH 251") (Word variations have been searched)  
#543 ("CBL 018") (Word variations have been searched)  
#544 ("FUB JWH-018") (Word variations have been searched)  
#545 ("FUB-JWH 018") (Word variations have been searched)  
#546 ("FUB JWH 018") (Word variations have been searched)  
#547 ("FUBJWH 018") (Word variations have been searched)  
#548 ("FUB-JWH018") (Word variations have been searched)  
#549 ("FUB JWH018") (Word variations have been searched)  
#550 ("FUB 018") (Word variations have been searched)  
#551 ("JWH-302") (Word variations have been searched)  
#552 ("JWH 302") (Word variations have been searched)  
#553 ("ADB-CHMICA") (Word variations have been searched)  
#554 ("ADB CHMICA") (Word variations have been searched)  
#555 ("AB-005") (Word variations have been searched)  
#556 ("AB005") (Word variations have been searched)  
#557 ("AB 005") (Word variations have been searched)  
#558 ("ADB ICA") (Word variations have been searched)  
#559 ("ADBICA") (Word variations have been searched)  
#560 ("AM-1248") (Word variations have been searched)  
#561 ("AM 1248") (Word variations have been searched)  
#562 ("BB-22") (Word variations have been searched)  
#563 ("BB 22") (Word variations have been searched)  
#564 ("BB22") (Word variations have been searched)  
#565 ("QUCHIC") (Word variations have been searched)  
#566 ("FUB-PB-22") (Word variations have been searched)  
#567 ("FUB-PB 22") (Word variations have been searched)  
#568 ("FUB PB-22") (Word variations have been searched)  
#569 ("FUB PB 22") (Word variations have been searched)

#570 ("FUBPB 22") (Word variations have been searched)  
#571 ("AM-1220") (Word variations have been searched)  
#572 ("AM1220") (Word variations have been searched)  
#573 ("AM 1220") (Word variations have been searched)  
#574 ("NRG-4") (Word variations have been searched)  
#575 ("NRG4") (Word variations have been searched)  
#576 ("NRG 4") (Word variations have been searched)  
#577 ("RCS-4") (Word variations have been searched)  
#578 ("RCS4") (Word variations have been searched)  
#579 ("RCS 4") (Word variations have been searched)  
#580 ("PX-1") (Word variations have been searched)  
#581 ("PX1") (Word variations have been searched)  
#582 ("PX 1") (Word variations have been searched)  
#583 ("5F-APP-PICA") (Word variations have been searched)  
#584 ("5F APP-PICA") (Word variations have been searched)  
#585 ("5F APP PICA") (Word variations have been searched)  
#586 ("5FSDB 006") (Word variations have been searched)  
#587 ("A-796,260") (Word variations have been searched)  
#588 ("A796,260") (Word variations have been searched)  
#589 ("A 796,260") (Word variations have been searched)  
#590 ("A-834,735") (Word variations have been searched)  
#591 ("5F-ADBICA") (Word variations have been searched)  
#592 ("5F ADBICA") (Word variations have been searched)  
#593 ("5F-ADB PICA") (Word variations have been searched)  
#594 ("5F ADB PICA") (Word variations have been searched)  
#595 ("JWH-018") (Word variations have been searched)  
#596 ("JWH018") (Word variations have been searched)  
#597 ("JWH 018") (Word variations have been searched)  
#598 ("CHM 018") (Word variations have been searched)  
#599 ("NE-CHMIMO") (Word variations have been searched)  
#600 ("NE CHMIMO") (Word variations have been searched)  
#601 ("MMB-2201") (Word variations have been searched)  
#602 ("MMB 2201") (Word variations have been searched)  
#603 ("CUMYL-BICA") (Word variations have been searched)  
#604 ("CUMYL BICA") (Word variations have been searched)  
#605 ("CUMYL-PICA") (Word variations have been searched)  
#606 ("CUMYL PICA") (Word variations have been searched)  
#607 ("5-Fluor NNEI") (Word variations have been searched)  
#608 ("5 Fluor-NNEI") (Word variations have been searched)  
#609 ("5Fluor NNEI") (Word variations have been searched)  
#610 ("5 FluorNNEI") (Word variations have been searched)  
#611 ("5F NNEI") (Word variations have been searched)  
#612 ("AM-6527") (Word variations have been searched)  
#613 ("AM6527") (Word variations have been searched)

#614 ("AM 6527") (Word variations have been searched)  
#615 ("AM-2201") (Word variations have been searched)  
#616 ("AM2201") (Word variations have been searched)  
#617 ("AM 2201") (Word variations have been searched)  
#618 ("JWH-073") (Word variations have been searched)  
#619 ("JWH073") (Word variations have been searched)  
#620 ("JWH 073") (Word variations have been searched)  
#621 ("MAM-2201") (Word variations have been searched)  
#622 ("MAM2201") (Word variations have been searched)  
#623 ("MAM 2201") (Word variations have been searched)  
#624 ("MDMB-CHMICA") (Word variations have been searched)  
#625 ("MDMB CHMICA") (Word variations have been searched)  
#626 ("JWH-200") (Word variations have been searched)  
#627 ("JWH 200") (Word variations have been searched)  
#628 ("JWH-122") (Word variations have been searched)  
#629 ("JWH122") (Word variations have been searched)  
#630 ("JWH 122") (Word variations have been searched)  
#631 ("FUB UR-144") (Word variations have been searched)  
#632 ("FUB UR 144") (Word variations have been searched)  
#633 ("FUB-UR 144") (Word variations have been searched)  
#634 ("FUBUR 144") (Word variations have been searched)  
#635 ("FUB 144") (Word variations have been searched)  
#636 ("5F-PB-22") (Word variations have been searched)  
#637 ("5F PB-22") (Word variations have been searched)  
#638 ("5F PB 22") (Word variations have been searched)  
#639 ("5F-PB 22") (Word variations have been searched)  
#640 ("5F-PB22") (Word variations have been searched)  
#641 ("5F PB22") (Word variations have been searched)  
#642 ("KM X1") (Word variations have been searched)  
#643 ("KM-X1") (Word variations have been searched)  
#644 ("KMX-1") (Word variations have been searched)  
#645 ("KMX 1") (Word variations have been searched)  
#646 ("KMX1") (Word variations have been searched)  
#647 ("TMCP 018") (Word variations have been searched)  
#648 ("MN-001") (Word variations have been searched)  
#649 ("MN001") (Word variations have been searched)  
#650 ("MN 001") (Word variations have been searched)  
#651 ("MDMB-FUBICA") (Word variations have been searched)  
#652 ("MDMB FUBICA") (Word variations have been searched)  
#653 ("5F MDMB-2201") (Word variations have been searched)  
#654 ("5F MDMB 2201") (Word variations have been searched)  
#655 ("MDMB-2201") (Word variations have been searched)  
#656 ("MDMB 2201") (Word variations have been searched)  
#657 ("5F-MDMB-PICA") (Word variations have been searched)

#658 ("5F MDMB-PICA") (Word variations have been searched)  
#659 ("5F-MDMB PICA") (Word variations have been searched)  
#660 ("5F MDMB PICA") (Word variations have been searched)  
#661 ("AMB-CHMICA") (Word variations have been searched)  
#662 ("AMB CHMICA") (Word variations have been searched)  
#663 ("CBL-2201") (Word variations have been searched)  
#664 ("CBL2201") (Word variations have been searched)  
#665 ("CBL 2201") (Word variations have been searched)  
#666 ("NM-2201") (Word variations have been searched)  
#667 ("NM2201") (Word variations have been searched)  
#668 ("NM 2201") (Word variations have been searched)  
#669 ("STS-135") (Word variations have been searched)  
#670 ("STS135") (Word variations have been searched)  
#671 ("STS 135") (Word variations have been searched)  
#672 ("5F-APICA") (Word variations have been searched)  
#673 ("5F APICA") (Word variations have been searched)  
#674 ("5F-CUMYL-PICA") (Word variations have been searched)  
#675 ("5F CUMYL-PICA") (Word variations have been searched)  
#676 ("5F-CUMYL PICA") (Word variations have been searched)  
#677 ("5F CUMYL PICA") (Word variations have been searched)  
#678 ("PB-22") (Word variations have been searched)  
#679 ("PB22") (Word variations have been searched)  
#680 ("PB 22") (Word variations have been searched)  
#681 ("5F-AB 144") (Word variations have been searched)  
#682 ("5F AB 144") (Word variations have been searched)  
#683 ("5FAB 144") (Word variations have been searched)  
#684 ("5FADBICA 144") (Word variations have been searched)  
#685 ("5F-AMBICA") (Word variations have been searched)  
#686 ("5F AMBICA") (Word variations have been searched)  
#687 ("XLR-11") (Word variations have been searched)  
#688 ("XLR11") (Word variations have been searched)  
#689 ("XLR 11") (Word variations have been searched)  
#690 ("5 FUR-144") (Word variations have been searched)  
#691 ("5FUR-144") (Word variations have been searched)  
#692 ("5FUR 144") (Word variations have been searched)  
#693 ("5 FUR144") (Word variations have been searched)  
#694 ("SDB-006") (Word variations have been searched)  
#695 ("SDB 006") (Word variations have been searched)  
#696 ("5F APINAC") (Word variations have been searched)  
#697 ("5F-PY-PICA") (Word variations have been searched)  
#698 ("5F PY-PICA") (Word variations have been searched)  
#699 ("5F-PY PICA") (Word variations have been searched)  
#700 ("5F PY PICA") (Word variations have been searched)  
#701 ("CRA13") (Word variations have been searched)

#702 ("CB-13") (Word variations have been searched)  
#703 ("CB13") (Word variations have been searched)  
#704 ("CB 13") (Word variations have been searched)  
#705 ("SAB-378") (Word variations have been searched)  
#706 ("SAB378") (Word variations have been searched)  
#707 ("SAB 378") (Word variations have been searched)  
#708 ("AZ-037") (Word variations have been searched)  
#709 ("AZ 037") (Word variations have been searched)  
#710 ("5F-5,3-AB-PFUPPYCA") (Word variations have been searched)  
#711 ("5F-5,3 AB-PFUPPYCA") (Word variations have been searched)  
#712 ("5F 5,3 AB PFUPPYCA") (Word variations have been searched)  
#713 ("5F5,3-AB-PFUPPYCA") (Word variations have been searched)  
#714 ("5F5,3 AB-PFUPPYCA") (Word variations have been searched)  
#715 ("5F-5,3AB-PFUPPYCA") (Word variations have been searched)  
#716 ("5F-5,3-ABPFUPPYCA") (Word variations have been searched)  
#717 ("5F-5,3 ABPFUPPYCA") (Word variations have been searched)  
#718 ("5F5,3AB-PFUPPYCA") (Word variations have been searched)  
#719 ("5F-5,3ABPFUPPYCA") (Word variations have been searched)  
#720 ("5F5,3-ABPFUPPYCA") (Word variations have been searched)  
#721 ("5F5,3 ABPFUPPYCA") (Word variations have been searched)  
#722 ("5F5,3ABPFUPPYCA") (Word variations have been searched)  
#723 ("5F-SGT-151") (Word variations have been searched)  
#724 ("5F SGT-151") (Word variations have been searched)  
#725 ("5F-SGT 151") (Word variations have been searched)  
#726 ("5F SGT 151") (Word variations have been searched)  
#727 ("5FSGT 151") (Word variations have been searched)  
#728 ("5F-SGT151") (Word variations have been searched)  
#729 ("5F-CUMYL-PeGaClone") (Word variations have been searched)  
#730 ("5F CUMYL-PeGaClone") (Word variations have been searched)  
#731 ("5F-CUMYL PeGaClone") (Word variations have been searched)  
#732 ("5F CUMYL PeGaClone") (Word variations have been searched)  
#733 ("5FCUMYL PeGaClone") (Word variations have been searched)  
#734 ("SGT-151") (Word variations have been searched)  
#735 ("SGT 151") (Word variations have been searched)  
#736 ("CUMYL-PeGaClone") (Word variations have been searched)  
#737 ("CUMYL PeGaClone") (Word variations have been searched)  
#738 ("CUMYL CH-MeGaClone") (Word variations have been searched)  
#739 ("CUMYL-CH MeGaClone") (Word variations have been searched)  
#740 ("CUMYLCH MeGaClone") (Word variations have been searched)  
#741 ("CUMYL CHMeGaClone") (Word variations have been searched)  
#742 ("JWH 145") (Word variations have been searched)  
#743 ("JWH-030") (Word variations have been searched)  
#744 ("JWH 030") (Word variations have been searched)  
#745 ("JWH-307") (Word variations have been searched)

#746 ("JWH 307") (Word variations have been searched)  
#747 ("JWH 182") (Word variations have been searched)  
#748 ("JWH 370") (Word variations have been searched)  
#749 ("JWH 368") (Word variations have been searched)  
#750 ("A-836,339") (Word variations have been searched)  
#751 ("MDA-19") (Word variations have been searched)  
#752 ("MDA19") (Word variations have been searched)  
#753 ("MDA 19") (Word variations have been searched)  
#754 ("HU-210") (Word variations have been searched)  
#755 ("HU210") (Word variations have been searched)  
#756 ("HU 210") (Word variations have been searched)  
#757 ("HU-331") (Word variations have been searched)  
#758 ("HU331") (Word variations have been searched)  
#759 ("HU 331") (Word variations have been searched)  
#760 ("Trans-CP-47,497-C8") (Word variations have been searched)  
#761 ("Trans CP-47,497-C8") (Word variations have been searched)  
#762 ("Trans-CP 47,497-C8") (Word variations have been searched)  
#763 ("Trans-CP-47,497 C8") (Word variations have been searched)  
#764 ("Trans-CP 47,497 C8") (Word variations have been searched)  
#765 ("Trans CP 47,497C8") (Word variations have been searched)  
#766 ("Trans CP 47,497-C8") (Word variations have been searched)  
#767 ("Trans CP 47,497 C8") (Word variations have been searched)  
#768 ("TransCP-47,497-C8") (Word variations have been searched)  
#769 ("TransCP 47,497-C8") (Word variations have been searched)  
#770 ("TransCP-47,497 C8") (Word variations have been searched)  
#771 ("TransCP 47,497 C8") (Word variations have been searched)  
#772 ("Trans-CP47,497-C8") (Word variations have been searched)  
#773 ("Trans-CP47,497 C8") (Word variations have been searched)  
#774 ("Trans-CP-47,497C8") (Word variations have been searched)  
#775 ("Trans-CP 47,497C8") (Word variations have been searched)  
#776 ("TransCP47,497-C8") (Word variations have been searched)  
#777 ("TransCP47,497 C8") (Word variations have been searched)  
#778 ("Trans CP47,497C8") (Word variations have been searched)  
#779 ("TransCP 47,497C8") (Word variations have been searched)  
#780 ("WIN 55212-2") (Word variations have been searched)  
#781 ("WIN-55212-2") (Word variations have been searched)  
#782 ("WIN55212-2") (Word variations have been searched)  
#783 ("WIN 55212 2") (Word variations have been searched)  
#784 ("WIN552122") (Word variations have been searched)  
#785 ("WIN-55212 2") (Word variations have been searched)  
#786 ("WIN55212 2") (Word variations have been searched)  
#787 ("5F-ADB") (Word variations have been searched)  
#788 ("5F ADB") (Word variations have been searched)  
#789 ("5F NPB-22-7N") (Word variations have been searched)

#790 ("5F-NPB 22-7N") (Word variations have been searched)  
#791 ("5F-NPB-22 7N") (Word variations have been searched)  
#792 ("5F NPB 22 7N") (Word variations have been searched)  
#793 ("5F-NPB 22 7N") (Word variations have been searched)  
#794 ("5F NPB-22 7N") (Word variations have been searched)  
#795 ("5F NPB 22-7N") (Word variations have been searched)  
#796 ("5FNPB 22-7N") (Word variations have been searched)  
#797 ("5FNPB-22 7N") (Word variations have been searched)  
#798 ("5FNPB 22 7N") (Word variations have been searched)  
#799 ("5F-NPB22 7N") (Word variations have been searched)  
#800 ("5F NPB22 7N") (Word variations have been searched)  
#801 ("5F NP B227N") (Word variations have been searched)  
#802 ("5FNPB22 7N") (Word variations have been searched)  
#803 ("5FNPB 227N") (Word variations have been searched)  
#804 ("5F AKB-48-7N") (Word variations have been searched)  
#805 ("5F-AKB 48-7N") (Word variations have been searched)  
#806 ("5F-AKB-48 7N") (Word variations have been searched)  
#807 ("5F AKB 48 7N") (Word variations have been searched)  
#808 ("5F-AKB 48 7N") (Word variations have been searched)  
#809 ("5F AKB-48 7N") (Word variations have been searched)  
#810 ("5F AKB 48-7N") (Word variations have been searched)  
#811 ("5F-AKB 487N") (Word variations have been searched)  
#812 ("5FAKB48 7N") (Word variations have been searched)  
#813 ("5F-EDMB-PINACA") (Word variations have been searched)  
#814 ("5F EDMB-PINACA") (Word variations have been searched)  
#815 ("5F-EDMB PINACA") (Word variations have been searched)  
#816 ("5F EDMB PINACA") (Word variations have been searched)  
#817 ("5FEDMB PINACA") (Word variations have been searched)  
#818 ("5F-MDMB-PINACA") (Word variations have been searched)  
#819 ("5F MDMB-PINACA") (Word variations have been searched)  
#820 ("5F-MDMB PINACA") (Word variations have been searched)  
#821 ("5F MDMB PINACA") (Word variations have been searched)  
#822 ("5FMDMB PINACA") (Word variations have been searched)  
#823 ("EMB-FUBINACA") (Word variations have been searched)  
#824 ("EMB FUBINACA") (Word variations have been searched)  
#825 ("EG-018") (Word variations have been searched)  
#826 ("EG 018") (Word variations have been searched)  
#827 ("EG-2201") (Word variations have been searched)  
#828 ("5F-AB-PINACA") (Word variations have been searched)  
#829 ("5F AB-PINACA") (Word variations have been searched)  
#830 ("5F-AB PINACA") (Word variations have been searched)  
#831 ("5F AB PINACA") (Word variations have been searched)  
#832 ("5FAB PINACA") (Word variations have been searched)  
#833 ("5F-AMB") (Word variations have been searched)

#834 ("5F AMB") (Word variations have been searched)  
#835 ("AB-CHMINACA") (Word variations have been searched)  
#836 ("AB CHMINACA") (Word variations have been searched)  
#837 ("AB-PINACA") (Word variations have been searched)  
#838 ("AB PINACA") (Word variations have been searched)  
#839 ("ABPINACA") (Word variations have been searched)  
#840 ("FUBIMINA") (Word variations have been searched)  
#841 ("AB-PINACA-CHM") (Word variations have been searched)  
#842 ("AB PINACA-CHM") (Word variations have been searched)  
#843 ("AB-PINACA CHM") (Word variations have been searched)  
#844 ("AB PINACA CHM") (Word variations have been searched)  
#845 ("TMCP-2201") (Word variations have been searched)  
#846 ("TMCP 2201") (Word variations have been searched)  
#847 ("MBA-2201") (Word variations have been searched)  
#848 ("MBA 2201") (Word variations have been searched)  
#849 ("QCBL(N)-2201") (Word variations have been searched)  
#850 ("QCBL(N) 2201") (Word variations have been searched)  
#851 ("QCBL(N)2201") (Word variations have been searched)  
#852 ("CP55, 940") (Word variations have been searched)  
#853 ("CP55,940") (Word variations have been searched)  
#854 ("MDMB-CHMINACA") (Word variations have been searched)  
#855 ("MDMB CHMINACA") (Word variations have been searched)  
#856 ("AMB-FUBINACA") (Word variations have been searched)  
#857 ("AMB FUBINACA") (Word variations have been searched)  
#858 ("MMB-FUBINACA") (Word variations have been searched)  
#859 ("MMB FUBINACA") (Word variations have been searched)  
#860 ("FUB-AMB") (Word variations have been searched)  
#861 ("FUB AMB") (Word variations have been searched)  
#862 ("MDMB-FUBINACA") (Word variations have been searched)  
#863 ("MDMB FUBINACA") (Word variations have been searched)  
#864 ("QUPIC") (Word variations have been searched)  
#865 ("5F-QUPIC") (Word variations have been searched)  
#866 ("5F QUPIC") (Word variations have been searched)  
#867 ("NPB-22") (Word variations have been searched)  
#868 ("NPB 22") (Word variations have been searched)  
#869 ("5F-NPB-22") (Word variations have been searched)  
#870 ("5F NPB-22") (Word variations have been searched)  
#871 ("5F-NPB 22") (Word variations have been searched)  
#872 ("5F NPB 22") (Word variations have been searched)  
#873 ("5FNPB 22") (Word variations have been searched)  
#874 ("FUB-NPB-22") (Word variations have been searched)  
#875 ("FUB NPB-22") (Word variations have been searched)  
#876 ("FUB-NPB 22") (Word variations have been searched)  
#877 ("FUB NPB 22") (Word variations have been searched)



#878 ("FUBNPB 22") (Word variations have been searched)  
#879 ("FUB NPB22") (Word variations have been searched)  
#880 ("MMB-CHMINACA") (Word variations have been searched)  
#881 ("MMB CHMINACA") (Word variations have been searched)  
#882 ("MDMB-CHMCZCA") (Word variations have been searched)  
#883 ("MDMB CHMCZCA") (Word variations have been searched)  
#884 ("AMB CHMINACA") (Word variations have been searched)  
#885 ("win55212") (Word variations have been searched)  
#886 ("Trans CP-47,497 C8") (Word variations have been searched)  
#887 ("TransCP 47,497 C8") (Word variations have been searched)  
#888 ("Trans CP-47,497C8") (Word variations have been searched)  
#889 ("tetrahydrocannabivarin") (Word variations have been searched)  
#890 ("cannabigerol") (Word variations have been searched)  
#891 ("11-hydroxy-THC") (Word variations have been searched)  
#892 ("11 hydroxy-THC") (Word variations have been searched)  
#893 ("11-hydroxy THC") (Word variations have been searched)  
#894 ("11 hydroxy THC") (Word variations have been searched)  
#895 ("11hydroxy THC") (Word variations have been searched)  
#896 ("11-hydroxyTHC") (Word variations have been searched)  
#897 ("11 hydroxyTHC") (Word variations have been searched)  
#898 ("11-OH-THC") (Word variations have been searched)  
#899 ("11 OH-THC") (Word variations have been searched)  
#900 ("11-OH THC") (Word variations have been searched)  
#901 ("11 OH THC") (Word variations have been searched)  
#902 ("11-OHTHC") (Word variations have been searched)  
#903 ("11 OHTHC") (Word variations have been searched)  
#904 ("11-hydroxy-tetrahydrocannabinol") (Word variations have been searched)  
#905 ("11 hydroxy-tetrahydrocannabinol") (Word variations have been searched)  
#906 ("11-hydroxy tetrahydrocannabinol") (Word variations have been searched)  
#907 ("11 hydroxy tetrahydrocannabinol") (Word variations have been searched)  
#908 ("11hydroxy tetrahydrocannabinol") (Word variations have been searched)  
#909 ("11-hydroxytetrahydrocannabinol") (Word variations have been searched)  
#910 ("11 hydroxytetrahydrocannabinol") (Word variations have been searched)  
#911 ("11 oh-delta-9-THC") (Word variations have been searched)  
#912 ("11-oh delta-9-THC") (Word variations have been searched)  
#913 ("11-oh-delta 9-THC") (Word variations have been searched)  
#914 ("11-oh-delta-9 THC") (Word variations have been searched)  
#915 ("11 oh delta 9 THC") (Word variations have been searched)  
#916 ("11-oh delta 9 THC") (Word variations have been searched)  
#917 ("11 oh-delta 9 THC") (Word variations have been searched)  
#918 ("11 oh delta-9 THC") (Word variations have been searched)  
#919 ("11 oh delta 9-THC") (Word variations have been searched)  
#920 ("11-oh-delta 9 THC") (Word variations have been searched)  
#921 ("11 oh-delta-9 THC") (Word variations have been searched)

#922 ("11 oh delta-9-THC") (Word variations have been searched)  
#923 ("11-oh delta-9 THC") (Word variations have been searched)  
#924 ("11 oh-delta 9-THC") (Word variations have been searched)  
#925 ("11-oh delta 9-THC") (Word variations have been searched)  
#926 ("11oh-delta 9-THC") (Word variations have been searched)  
#927 ("11oh-delta-9 THC") (Word variations have been searched)  
#928 ("11oh-delta 9 THC") (Word variations have been searched)  
#929 ("11 ohdelta-9-THC") (Word variations have been searched)  
#930 ("11-ohdelta 9-THC") (Word variations have been searched)  
#931 ("11-ohdelta-9 THC") (Word variations have been searched)  
#932 ("11-oh-delta9-THC") (Word variations have been searched)  
#933 ("11 oh-delta9-THC") (Word variations have been searched)  
#934 ("11-oh delta9-THC") (Word variations have been searched)  
#935 ("11-oh-delta9 THC") (Word variations have been searched)  
#936 ("11 oh delta9 THC") (Word variations have been searched)  
#937 ("11-oh delta9 THC") (Word variations have been searched)  
#938 ("11 oh-delta9 THC") (Word variations have been searched)  
#939 ("11 oh delta9-THC") (Word variations have been searched)  
#940 ("11 oh-delta-9THC") (Word variations have been searched)  
#941 ("11-oh delta 9THC") (Word variations have been searched)  
#942 ("11 oh delta 9THC") (Word variations have been searched)  
#943 ("Delta-8-tetrahydrocannabinol") (Word variations have been searched)  
#944 ("Delta 8-tetrahydrocannabinol") (Word variations have been searched)  
#945 ("Delta-8 tetrahydrocannabinol") (Word variations have been searched)  
#946 ("Delta 8 tetrahydrocannabinol") (Word variations have been searched)  
#947 ("Delta8-tetrahydrocannabinol") (Word variations have been searched)  
#948 ("Delta8 tetrahydrocannabinol") (Word variations have been searched)  
#949 ("Delta 8tetrahydrocannabinol") (Word variations have been searched)  
#950 ("Delta8tetrahydrocannabinol") (Word variations have been searched)  
#951 ("D 8-tetrahydrocannabinol") (Word variations have been searched)  
#952 ("D-8 tetrahydrocannabinol") (Word variations have been searched)  
#953 ("D 8 tetrahydrocannabinol") (Word variations have been searched)  
#954 ("Δ-8-tetrahydrocannabinol") (Word variations have been searched)  
#955 ("Δ 8-tetrahydrocannabinol") (Word variations have been searched)  
#956 ("Δ-8 tetrahydrocannabinol") (Word variations have been searched)  
#957 ("Δ 8 tetrahydrocannabinol") (Word variations have been searched)  
#958 ("Δ8-tetrahydrocannabinol") (Word variations have been searched)  
#959 ("Δ8 tetrahydrocannabinol") (Word variations have been searched)  
#960 ("Δ 8tetrahydrocannabinol") (Word variations have been searched)  
#961 ("Δ8tetrahydrocannabinol") (Word variations have been searched)  
#962 ("Delta-8-THC") (Word variations have been searched)  
#963 ("Delta 8-THC") (Word variations have been searched)  
#964 ("Delta-8 THC") (Word variations have been searched)  
#965 ("Delta 8 THC") (Word variations have been searched)

#966 ("Delta8-THC") (Word variations have been searched)  
#967 ("Delta8 THC") (Word variations have been searched)  
#968 ("Delta-8THC") (Word variations have been searched)  
#969 ("Delta 8THC") (Word variations have been searched)  
#970 ("Delta8THC") (Word variations have been searched)  
#971 ("D 8-THC") (Word variations have been searched)  
#972 ("D-8 THC") (Word variations have been searched)  
#973 ("D 8 THC") (Word variations have been searched)  
#974 ("D8THC") (Word variations have been searched)  
#975 ("Δ-8-THC") (Word variations have been searched)  
#976 ("Δ 8-THC") (Word variations have been searched)  
#977 ("Δ-8 THC") (Word variations have been searched)  
#978 ("Δ 8 THC") (Word variations have been searched)  
#979 ("Δ8-THC") (Word variations have been searched)  
#980 ("Δ8 THC") (Word variations have been searched)  
#981 ("Δ-8THC") (Word variations have been searched)  
#982 ("Δ 8THC") (Word variations have been searched)  
#983 ("Δ8THC") (Word variations have been searched)  
#984 ("anandamide") (Word variations have been searched)  
#985 ("N-arachidonylethanolamine") (Word variations have been searched)  
#986 ("N arachidonylethanolamine") (Word variations have been searched)  
#987 ("9-thc") (Word variations have been searched)  
#988 ("9 thc") (Word variations have been searched)  
#989 ("9thc") (Word variations have been searched)  
#990 ("Delta-tetrahydrocannabinol") (Word variations have been searched)  
#991 ("Delta tetrahydrocannabinol") (Word variations have been searched)  
#992 ("Deltatetrahydrocannabinol") (Word variations have been searched)  
#993 ("D-tetrahydrocannabinol") (Word variations have been searched)  
#994 ("D tetrahydrocannabinol") (Word variations have been searched)  
#995 ("Δ-tetrahydrocannabinol") (Word variations have been searched)  
#996 ("Δ tetrahydrocannabinol") (Word variations have been searched)  
#997 ("Δtetrahydrocannabinol") (Word variations have been searched)  
#998 ("Delta-THC") (Word variations have been searched)  
#999 ("Delta THC") (Word variations have been searched)  
#1000 ("DeltaTHC") (Word variations have been searched)  
#1001 ("D-THC") (Word variations have been searched)  
#1002 ("D THC") (Word variations have been searched)  
#1003 ("DTHC") (Word variations have been searched)  
#1004 ("Δ-THC") (Word variations have been searched)  
#1005 ("Δ THC") (Word variations have been searched)  
#1006 ("ΔTHC") (Word variations have been searched)  
#1007 ("11-Palmitoyloxy-d 9-tetrahydrocannabinol") (Word variations have been searched)

- #1008 ("11-Palmitoyloxy- $\Delta$  9-tetrahydrocannabinol") (Word variations have been searched)
- #1009 ("11-Palmitoyloxy-delta 9-THC") (Word variations have been searched)
- #1010 ("11-Palmitoyloxy-d 9-THC") (Word variations have been searched)
- #1011 ("11-Palmitoyloxy- $\Delta$  9-THC") (Word variations have been searched)
- #1012 ("11-palm-d 9-thc") (Word variations have been searched)
- #1013 ("11-palm- $\Delta$  9-thc") (Word variations have been searched)
- #1014 ("11-palm-delta 9-tetrahydrocannabinol") (Word variations have been searched)
- #1015 ("11-palm-d 9-tetrahydrocannabinol") (Word variations have been searched)
- #1016 ("11-palm- $\Delta$  9-tetrahydrocannabinol") (Word variations have been searched)
- #1017 ("cp55940") (Word variations have been searched)
- #1018 ("cp-55940") (Word variations have been searched)
- #1019 ("cp 55940") (Word variations have been searched)
- #1020 ("CP-55,940") (Word variations have been searched)
- #1021 ("CP 55,940") (Word variations have been searched)
- #1022 ("11-oh-tetrahydrocannabinol") (Word variations have been searched)
- #1023 ("11 oh-tetrahydrocannabinol") (Word variations have been searched)
- #1024 ("11-oh tetrahydrocannabinol") (Word variations have been searched)
- #1025 ("11 oh tetrahydrocannabinol") (Word variations have been searched)
- #1026 ("11 ohtetrahydrocannabinol") (Word variations have been searched)
- #1027 ("beta hhc") (Word variations have been searched)
- #1028 ("beta-hhc") (Word variations have been searched)
- #1029 (" $\beta$ -hhc") (Word variations have been searched)
- #1030 (" $\beta$  hhc") (Word variations have been searched)
- #1031 ("b hhc") (Word variations have been searched)
- #1032 ("bhhc") (Word variations have been searched)
- #1033 ("beta-hydroxyhexahydrocannabinol") (Word variations have been searched)
- #1034 ("beta hydroxyhexahydrocannabinol") (Word variations have been searched)
- #1035 (" $\beta$ -hydroxyhexahydrocannabinol") (Word variations have been searched)
- #1036 (" $\beta$  hydroxyhexahydrocannabinol") (Word variations have been searched)
- #1037 ("b hydroxyhexahydrocannabinol") (Word variations have been searched)
- #1038 ("hydroxyhexahydrocannabinol") (Word variations have been searched)
- #1039 ("methanandamide") (Word variations have been searched)
- #1040 ("AM-356") (Word variations have been searched)
- #1041 ("AM356") (Word variations have been searched)
- #1042 ("AM 356") (Word variations have been searched)
- #1043 ("sr-141716-a") (Word variations have been searched)
- #1044 ("sr 141716-a") (Word variations have been searched)
- #1045 ("sr-141716 a") (Word variations have been searched)
- #1046 ("sr 141716 a") (Word variations have been searched)
- #1047 ("sr141716-a") (Word variations have been searched)
- #1048 ("sr141716 a") (Word variations have been searched)
- #1049 ("sr-141716a") (Word variations have been searched)
- #1050 ("sr 141716a") (Word variations have been searched)

#1051 ("sr141716a") (Word variations have been searched)  
#1052 ("Delta-9-Tetrahydrocannabutol") (Word variations have been searched)  
#1053 ("Delta 9-Tetrahydrocannabutol") (Word variations have been searched)  
#1054 ("Delta-9 Tetrahydrocannabutol") (Word variations have been searched)  
#1055 ("Delta 9 Tetrahydrocannabutol") (Word variations have been searched)  
#1056 ("Delta9-Tetrahydrocannabutol") (Word variations have been searched)  
#1057 ("Delta9 Tetrahydrocannabutol") (Word variations have been searched)  
#1058 ("Delta9Tetrahydrocannabutol") (Word variations have been searched)  
#1059 ("Δ-9-Tetrahydrocannabutol") (Word variations have been searched)  
#1060 ("Δ 9-Tetrahydrocannabutol") (Word variations have been searched)  
#1061 ("Δ-9 Tetrahydrocannabutol") (Word variations have been searched)  
#1062 ("Δ 9 Tetrahydrocannabutol") (Word variations have been searched)  
#1063 ("Δ9-Tetrahydrocannabutol") (Word variations have been searched)  
#1064 ("Δ9 Tetrahydrocannabutol") (Word variations have been searched)  
#1065 ("Delta-9-THCB") (Word variations have been searched)  
#1066 ("Delta 9-THCB") (Word variations have been searched)  
#1067 ("Delta-9 THCB") (Word variations have been searched)  
#1068 ("Delta 9 THCB") (Word variations have been searched)  
#1069 ("Delta9 THCB") (Word variations have been searched)  
#1070 ("Δ-9-THCB") (Word variations have been searched)  
#1071 ("Δ 9-THCB") (Word variations have been searched)  
#1072 ("Δ-9 THCB") (Word variations have been searched)  
#1073 ("Δ 9 THCB") (Word variations have been searched)  
#1074 ("Δ9 THCB") (Word variations have been searched)  
#1075 ("CBDA") (Word variations have been searched)  
#1076 ("HU-580") (Word variations have been searched)  
#1077 ("HU 580") (Word variations have been searched)  
#1078 ("CBDV") (Word variations have been searched)  
#1079 (cannabidivarin\*) (Word variations have been searched)  
#1080 ("CP-47497") (Word variations have been searched)  
#1081 ("CP 47497") (Word variations have been searched)  
#1082 ("CP47497") (Word variations have been searched)  
#1083 ("Trans-CCH") (Word variations have been searched)  
#1084 ("cannabicyclohexanol") (Word variations have been searched)  
#1085 ("Delta-(1)-tetrahydrocannabinolic acid") (Word variations have been searched)  
#1086 ("Delta (1)-tetrahydrocannabinolic acid") (Word variations have been searched)  
#1087 ("Delta-(1) tetrahydrocannabinolic acid") (Word variations have been searched)  
#1088 ("Delta (1) tetrahydrocannabinolic acid") (Word variations have been searched)  
#1089 ("Delta(1)-tetrahydrocannabinolic acid") (Word variations have been searched)  
#1090 ("Delta(1) tetrahydrocannabinolic acid") (Word variations have been searched)  
#1091 ("Delta-(1)tetrahydrocannabinolic acid") (Word variations have been searched)  
#1092 ("Delta (1)tetrahydrocannabinolic acid") (Word variations have been searched)  
#1093 ("Delta(1)tetrahydrocannabinolic acid") (Word variations have been searched)  
#1094 ("Delta-1-tetrahydrocannabinolic acid") (Word variations have been searched)

#1095 ("Delta 1-tetrahydrocannabinolic acid") (Word variations have been searched)  
#1096 ("Delta-1 tetrahydrocannabinolic acid") (Word variations have been searched)  
#1097 ("Delta 1 tetrahydrocannabinolic acid") (Word variations have been searched)  
#1098 ("Delta1-tetrahydrocannabinolic acid") (Word variations have been searched)  
#1099 ("Delta1 tetrahydrocannabinolic acid") (Word variations have been searched)  
#1100 ("Δ-(1)-tetrahydrocannabinolic acid") (Word variations have been searched)  
#1101 ("Δ (1)-tetrahydrocannabinolic acid") (Word variations have been searched)  
#1102 ("Δ-(1) tetrahydrocannabinolic acid") (Word variations have been searched)  
#1103 ("Δ (1) tetrahydrocannabinolic acid") (Word variations have been searched)  
#1104 ("Δ(1)-tetrahydrocannabinolic acid") (Word variations have been searched)  
#1105 ("Δ(1) tetrahydrocannabinolic acid") (Word variations have been searched)  
#1106 ("Δ-(1)tetrahydrocannabinolic acid") (Word variations have been searched)  
#1107 ("Δ (1)tetrahydrocannabinolic acid") (Word variations have been searched)  
#1108 ("Δ(1)tetrahydrocannabinolic acid") (Word variations have been searched)  
#1109 ("Δ-1-tetrahydrocannabinolic acid") (Word variations have been searched)  
#1110 ("Δ 1-tetrahydrocannabinolic acid") (Word variations have been searched)  
#1111 ("Δ-1 tetrahydrocannabinolic acid") (Word variations have been searched)  
#1112 ("Δ 1 tetrahydrocannabinolic acid") (Word variations have been searched)  
#1113 ("Δ1-tetrahydrocannabinolic acid") (Word variations have been searched)  
#1114 ("Δ1 tetrahydrocannabinolic acid") (Word variations have been searched)  
#1115 ("D-(1)-tetrahydrocannabinolic acid") (Word variations have been searched)  
#1116 ("D (1)-tetrahydrocannabinolic acid") (Word variations have been searched)  
#1117 ("D-(1) tetrahydrocannabinolic acid") (Word variations have been searched)  
#1118 ("D (1) tetrahydrocannabinolic acid") (Word variations have been searched)  
#1119 ("D(1)-tetrahydrocannabinolic acid") (Word variations have been searched)  
#1120 ("D(1) tetrahydrocannabinolic acid") (Word variations have been searched)  
#1121 ("D-(1)tetrahydrocannabinolic acid") (Word variations have been searched)  
#1122 ("D (1)tetrahydrocannabinolic acid") (Word variations have been searched)  
#1123 ("D(1)tetrahydrocannabinolic acid") (Word variations have been searched)  
#1124 ("D-1 tetrahydrocannabinolic acid") (Word variations have been searched)  
#1125 ("D 1 tetrahydrocannabinolic acid") (Word variations have been searched)  
#1126 ("Delta-(1)-THCA") (Word variations have been searched)  
#1127 ("Delta (1)-THCA") (Word variations have been searched)  
#1128 ("Delta-(1) THCA") (Word variations have been searched)  
#1129 ("Delta (1) THCA") (Word variations have been searched)  
#1130 ("Delta(1)-THCA") (Word variations have been searched)  
#1131 ("Delta(1) THCA") (Word variations have been searched)  
#1132 ("Delta-(1)THCA") (Word variations have been searched)  
#1133 ("Delta (1)THCA") (Word variations have been searched)  
#1134 ("Delta(1)THCA") (Word variations have been searched)  
#1135 ("Delta-1-THCA") (Word variations have been searched)  
#1136 ("Delta 1-THCA") (Word variations have been searched)  
#1137 ("Delta-1 THCA") (Word variations have been searched)  
#1138 ("Delta 1 THCA") (Word variations have been searched)

#1139 ("Delta1 THCA") (Word variations have been searched)  
#1140 ("Δ-(1)-THCA") (Word variations have been searched)  
#1141 ("Δ (1)-THCA") (Word variations have been searched)  
#1142 ("Δ-(1) THCA") (Word variations have been searched)  
#1143 ("Δ (1) THCA") (Word variations have been searched)  
#1144 ("Δ(1)-THCA") (Word variations have been searched)  
#1145 ("Δ(1) THCA") (Word variations have been searched)  
#1146 ("Δ-(1)THCA") (Word variations have been searched)  
#1147 ("Δ (1)THCA") (Word variations have been searched)  
#1148 ("Δ(1)THCA") (Word variations have been searched)  
#1149 ("Δ-1-THCA") (Word variations have been searched)  
#1150 ("Δ 1-THCA") (Word variations have been searched)  
#1151 ("Δ-1 THCA") (Word variations have been searched)  
#1152 ("Δ 1 THCA") (Word variations have been searched)  
#1153 ("Δ1 THCA") (Word variations have been searched)  
#1154 ("D-(1)-THCA") (Word variations have been searched)  
#1155 ("D (1)-THCA") (Word variations have been searched)  
#1156 ("D-(1) THCA") (Word variations have been searched)  
#1157 ("D (1) THCA") (Word variations have been searched)  
#1158 ("D(1)-THCA") (Word variations have been searched)  
#1159 ("D(1) THCA") (Word variations have been searched)  
#1160 ("D-(1)THCA") (Word variations have been searched)  
#1161 ("D (1)THCA") (Word variations have been searched)  
#1162 ("D(1)THCA") (Word variations have been searched)  
#1163 ("D 1 THCA") (Word variations have been searched)  
#1164 (THCA\*) (Word variations have been searched)  
#1165 ("Nor-9β-hydroxyhexahydrocannabinol") (Word variations have been searched)  
#1166 ("Nor 9β-hydroxyhexahydrocannabinol") (Word variations have been searched)  
#1167 ("Nor-9β hydroxyhexahydrocannabinol") (Word variations have been searched)  
#1168 ("Nor 9β hydroxyhexahydrocannabinol") (Word variations have been searched)  
#1169 ("Nor9β hydroxyhexahydrocannabinol") (Word variations have been searched)  
#1170 ("9-beta-hydroxy-hexahydrocannabinol") (Word variations have been searched)  
#1171 ("9-nor-9β-OH-HHC") (Word variations have been searched)  
#1172 ("9-Nor-9β-hydroxyhexahydrocannabinol") (Word variations have been searched)  
#1173 ("hash") (Word variations have been searched)  
#1174 ("ganja") (Word variations have been searched)  
#1175 ("bhang") (Word variations have been searched)  
#1176 OR/1-1175  
#1177 MeSH descriptor: [Arthritis, Rheumatoid] explode all trees  
#1178 ("RA") (Word variations have been searched)  
#1179 (rheumat\*) (Word variations have been searched)  
#1180 (reumat\*) (Word variations have been searched)  
#1181 ("super rheumatoid") (Word variations have been searched)  
#1182 (antirheumat\*) (Word variations have been searched)

#1183 (antireumat\*) (Word variations have been searched)  
 #1184 (“anti-rheumatic”) (Word variations have been searched)  
 #1185 (“anti-rheumatoid”) (Word variations have been searched)  
 #1186 (“anti-reumatic”) (Word variations have been searched)  
 #1187 (“anti-reumatoid”) (Word variations have been searched)  
 #1188 (((“caplan's” OR “caplan” OR “felty's” OR “felty”) AND (syndrom\* OR disease\*)))  
 (Word variations have been searched)  
 #1189 MeSH descriptor: [Felty Syndrome] explode all trees  
 #1190 MeSH descriptor: [Caplan Syndrome] explode all trees  
 #1191 MeSH descriptor: [Rheumatoid Nodule] explode all trees  
 #1192 OR/1177-1191  
 #1193 #1176 AND #1192

### **EMBASE (Elsevier) search strategy**

#1 marijuana smoking'/de  
 #2 marijuana use'/de  
 #3 dronabinol'/de  
 #4 cannabinoid'/de  
 #5 cannabis'/de  
 #6 medical marijuana'/de  
 #7 cannabaceae'/de  
 #8 endocannabinoid'/de  
 #9 cannabi\*  
 #10 cannabaceae'  
 #11 marijuan\*  
 #12 marihuan\*  
 #13 sativa'  
 #14 phytocannabinoid\*  
 #15 cbd\*  
 #16 epidiolex'  
 #17 zyn002'  
 #18 nabiximol\*  
 #19 sativex'  
 #20 tetrahydrocannab\*  
 #21 thc'  
 #22 endocannabinoid\*  
 #23 delta-9-tetrahydrocannabinol'  
 #24 delta 9-tetrahydrocannabinol'  
 #25 delta-9 tetrahydrocannabinol'  
 #26 delta 9 tetrahydrocannabinol'  
 #27 delta9-tetrahydrocannabinol'  
 #28 delta9 tetrahydrocannabinol'  
 #29 delta9tetrahydrocannabinol'  
 #30 delta-9tetrahydrocannabinol'



#31 delta 9tetrahydrocannabinol'  
#32 d-9-tetrahydrocannabinol'  
#33 d 9-tetrahydrocannabinol'  
#34 d-9 tetrahydrocannabinol'  
#35 d 9 tetrahydrocannabinol'  
#36 d9-tetrahydrocannabinol'  
#37 d9 tetrahydrocannabinol'  
#38  $\delta$ -9-tetrahydrocannabinol'  
#39  $\delta$  9-tetrahydrocannabinol'  
#40  $\delta$ -9 tetrahydrocannabinol'  
#41  $\delta$  9 tetrahydrocannabinol'  
#42  $\delta$ 9-tetrahydrocannabinol'  
#43  $\delta$ 9 tetrahydrocannabinol'  
#44  $\delta$ -9tetrahydrocannabinol'  
#45  $\delta$  9tetrahydrocannabinol'  
#46  $\delta$ 9tetrahydrocannabinol'  
#47 9-tetrahydrocannabinol'  
#48 9 tetrahydrocannabinol'  
#49 9tetrahydrocannabinol'  
#50 delta-9-thc'  
#51 delta 9-thc'  
#52 delta-9 thc'  
#53 delta 9 thc'  
#54 delta9-thc'  
#55 delta9 thc'  
#56 delta9thc'  
#57 delta-9thc'  
#58 delta 9thc'  
#59 d-9-thc'  
#60 d 9-thc'  
#61 d-9 thc'  
#62 d 9 thc'  
#63 d9-thc'  
#64 d9 thc'  
#65 d 9thc'  
#66 d9thc'  
#67  $\delta$ -9-thc'  
#68  $\delta$  9-thc'  
#69  $\delta$ -9 thc'  
#70  $\delta$  9 thc'  
#71  $\delta$ 9-thc'  
#72  $\delta$ 9 thc'  
#73  $\delta$ -9thc'  
#74  $\delta$  9thc'

#75  $\delta$ 9thc'  
#76 trans delta-9-tetrahydrocannabinol'  
#77 trans-delta 9-tetrahydrocannabinol'  
#78 trans-delta-9 tetrahydrocannabinol'  
#79 trans delta 9 tetrahydrocannabinol'  
#80 trans delta-9 tetrahydrocannabinol'  
#81 trans-delta 9 tetrahydrocannabinol'  
#82 trans delta 9-tetrahydrocannabinol'  
#83 transdelta-9 tetrahydrocannabinol'  
#84 transdelta 9-tetrahydrocannabinol'  
#85 transdelta 9 tetrahydrocannabinol'  
#86 trans-delta9-tetrahydrocannabinol'  
#87 trans delta9-tetrahydrocannabinol'  
#88 trans-delta9 tetrahydrocannabinol'  
#89 trans delta9 tetrahydrocannabinol'  
#90 transdelta 9tetrahydrocannabinol'  
#91 trans-d-9 tetrahydrocannabinol'  
#92 transd-9 tetrahydrocannabinol'  
#93 trans-d9 tetrahydrocannabinol'  
#94 transd9 tetrahydrocannabinol'  
#95 trans  $\delta$ -9-tetrahydrocannabinol'  
#96 trans- $\delta$  9-tetrahydrocannabinol'  
#97 trans- $\delta$ -9 tetrahydrocannabinol'  
#98 trans  $\delta$  9 tetrahydrocannabinol'  
#99 trans  $\delta$ -9 tetrahydrocannabinol'  
#100 trans- $\delta$  9 tetrahydrocannabinol'  
#101 trans  $\delta$  9-tetrahydrocannabinol'  
#102 trans $\delta$  9-tetrahydrocannabinol'  
#103 trans $\delta$ -9 tetrahydrocannabinol'  
#104 trans $\delta$  9 tetrahydrocannabinol'  
#105 trans- $\delta$ 9-tetrahydrocannabinol'  
#106 trans  $\delta$ 9-tetrahydrocannabinol'  
#107 trans- $\delta$ 9 tetrahydrocannabinol'  
#108 trans  $\delta$ 9 tetrahydrocannabinol'  
#109 trans $\delta$  9tetrahydrocannabinol'  
#110 trans delta-9-thc'  
#111 trans-delta 9-thc'  
#112 trans-delta-9 thc'  
#113 trans delta 9 thc'  
#114 trans delta-9 thc'  
#115 trans-delta 9 thc'  
#116 trans delta 9-thc'  
#117 transdelta 9-thc'  
#118 transdelta-9 thc'

#119 transdelta 9 thc'  
#120 trans delta9-thc'  
#121 trans-delta9 thc'  
#122 trans delta9 thc'  
#123 trans delta-9thc'  
#124 trans delta 9thc'  
#125 transdelta 9thc'  
#126 trans delta9thc'  
#127 trans-d-9 thc'  
#128 transd-9 thc'  
#129 trans-d9 thc'  
#130 transd9 thc'  
#131 trans- $\delta$ -9-thc'  
#132 trans  $\delta$ -9-thc'  
#133 trans- $\delta$  9-thc'  
#134 trans- $\delta$ -9 thc'  
#135 trans  $\delta$  9 thc'  
#136 trans  $\delta$ -9 thc'  
#137 trans- $\delta$  9 thc'  
#138 trans  $\delta$  9-thc'  
#139 trans $\delta$  9-thc'  
#140 trans $\delta$ -9 thc'  
#141 trans $\delta$  9 thc'  
#142 trans  $\delta$ 9-thc'  
#143 trans- $\delta$ 9 thc'  
#144 trans  $\delta$ 9 thc'  
#145 trans  $\delta$ -9thc'  
#146 trans  $\delta$  9thc'  
#147 trans  $\delta$ 9thc'  
#148 trans $\delta$  9thc'  
#149 dronabinol\*  
#150 marinol'  
#151 thcv'  
#152 nabilo\*  
#153 cesamet'  
#154 canemes'  
#155 levonantradol'  
#156 delta-1-tetrahydrocannabinol'  
#157 delta 1-tetrahydrocannabinol'  
#158 delta-1 tetrahydrocannabinol'  
#159 delta 1 tetrahydrocannabinol'  
#160 delta1-tetrahydrocannabinol'  
#161 delta1 tetrahydrocannabinol'  
#162 delta-1tetrahydrocannabinol'

#163 delta 1tetrahydrocannabinol'  
#164 d 1-tetrahydrocannabinol'  
#165 d-1 tetrahydrocannabinol'  
#166 d 1 tetrahydrocannabinol'  
#167 d1 tetrahydrocannabinol'  
#168  $\delta$ -1-tetrahydrocannabinol'  
#169  $\delta$  1-tetrahydrocannabinol'  
#170  $\delta$ -1 tetrahydrocannabinol'  
#171  $\delta$  1 tetrahydrocannabinol'  
#172  $\delta$ 1-tetrahydrocannabinol'  
#173  $\delta$ 1 tetrahydrocannabinol'  
#174  $\delta$ -1tetrahydrocannabinol'  
#175  $\delta$  1tetrahydrocannabinol'  
#176 1-tetrahydrocannabinol'  
#177 1 tetrahydrocannabinol'  
#178 1tetrahydrocannabinol'  
#179 1-thc'  
#180 1 thc'  
#181 delta-1-thc'  
#182 delta 1-thc'  
#183 delta-1 thc'  
#184 delta 1 thc'  
#185 delta1-thc'  
#186 delta1 thc'  
#187 delta1thc'  
#188 d 1-thc'  
#189 d-1 thc'  
#190 d 1 thc'  
#191 d1 thc'  
#192  $\delta$ -1-thc'  
#193  $\delta$  1-thc'  
#194  $\delta$ -1 thc'  
#195  $\delta$  1 thc'  
#196  $\delta$ 1-thc'  
#197  $\delta$ 1 thc'  
#198  $\delta$ 1thc'  
#199 ajulemic\*  
#200 jbt-101'  
#201 anabasum'  
#202 lenabasum'  
#203 resunab'  
#204 gw842166'  
#205 azd1940'  
#206 faah'

#207 pf04457845'  
#208 pf-04457845'  
#209 pf 04457845'  
#210 fatty acid amide'  
#211 fatty-acid amide'  
#212 fatty-acid-amide'  
#213 amidohydrolase'  
#214 hemp'  
#215 thc:cbd'  
#216 cbd:thc'  
#217 echinacea\*  
#218 jwh 071'  
#219 jwh-018-br'  
#220 jwh 018-br'  
#221 jwh-018 br'  
#222 jwh 018 br'  
#223 jwh018 br'  
#224 jwh-018br'  
#225 jwh 018br'  
#226 jwh-018-ci'  
#227 jwh 018-ci'  
#228 jwh-018 ci'  
#229 jwh 018 ci'  
#230 jwh018 ci'  
#231 jwh 018ci'  
#232 jwh-007'  
#233 jwh007'  
#234 jwh 007'  
#235 jwh-203'  
#236 jwh203'  
#237 jwh 203'  
#238 jwh-250'  
#239 jwh250'  
#240 jwh 250'  
#241 jwh-398'  
#242 jwh 398'  
#243 7?n-5f-adb'  
#244 7?n 5f-adb'  
#245 7?n-5f adb'  
#246 7?n 5f adb'  
#247 7?n 5fadb'  
#248 adb-chminaca'  
#249 mab-chminaca'  
#250 mab chminaca'

#251 mn-18'  
#252 mn18'  
#253 5f-mn-18'  
#254 5f mn-18'  
#255 5f-mn 18'  
#256 5f mn 18'  
#257 5fmn 18'  
#258 cbl(n)2201'  
#259 mdmb(n)-bz-f'  
#260 mdmb(n) bz-f'  
#261 mdmb(n)-bz f'  
#262 mdmb(n)bz-f'  
#263 mdmb(n)bz f'  
#264 fu aeb'  
#265 5f emb-fubinaca'  
#266 5f-emb fubinaca'  
#267 5f emb fubinaca'  
#268 5femb fubinaca'  
#269 fub amb-ethylester'  
#270 adamantyl chminaca'  
#271 5f jwh-018-n'  
#272 5f jwh 018 n'  
#273 5f jwh-018 n'  
#274 5f jwh 018-n'  
#275 5f jwh018 n'  
#276 5fjwh 018n'  
#277 5f thj-018'  
#278 5f-thj 018'  
#279 5f thj 018'  
#280 5fthj 018'  
#281 thj-2201'  
#282 thj 2201'  
#283 5cl-thj-018'  
#284 5cl thj-018'  
#285 5cl-thj 018'  
#286 5cl thj 018'  
#287 5clthj 018'  
#288 5cl jwh 018-n'  
#289 5cl jwh018-n'  
#290 5cl-jwh 018n'  
#291 5cl jwh-018n'  
#292 5cl jwh018n'  
#293 5cljwh 018n'  
#294 thj-018'

#295 thj 018'  
#296 mdmb-n-2201'  
#297 mdmb n-2201'  
#298 mdmb-n 2201'  
#299 mdmb n 2201'  
#300 mdmb-(n)-2201'  
#301 mdmb (n)-2201'  
#302 mdmb-(n) 2201'  
#303 mdmb (n) 2201'  
#304 mdmb(n)-2201'  
#305 mdmb(n) 2201'  
#306 mdmb-(n)2201'  
#307 mdmb (n)2201'  
#308 mdmb(n)2201'  
#309 4f-mdmb-binaca'  
#310 4f mdmb-binaca'  
#311 4f-mdmb binaca'  
#312 4f mdmb binaca'  
#313 4fmdmb binaca'  
#314 mn-24'  
#315 mn24'  
#316 mn 24'  
#317 sdb-001'  
#318 sdb 001'  
#319 mmb-chmica'  
#320 mmb chmica'  
#321 nnl-3'  
#322 nnl 3'  
#323 akb-48'  
#324 akb48'  
#325 akb 48'  
#326 5f-akb-48'  
#327 5f akb-48'  
#328 5f-akb 48'  
#329 5f akb 48'  
#330 5fakb-48'  
#331 5fakb 48'  
#332 5f-akb48'  
#333 5f akb48'  
#334 cp-47,497'  
#335 cp 47,497'  
#336 cp47,497'  
#337 (c7)-cp-47,497'  
#338 (c7) cp-47,497'

#339 (c7)-cp 47,497'  
#340 (c7) cp 47,497'  
#341 (c7)cp-47,497'  
#342 (c7)cp 47,497'  
#343 3-[2-hydroxy-4-(2-methyloctan-2-yl)phenyl]cyclohexan-1-ol'  
#344 cp-47,497-c8'  
#345 cp 47,497-c8'  
#346 cp-47,497 c8'  
#347 cp 47,497 c8'  
#348 cp47,497-c8'  
#349 cp47,497 c8'  
#350 cp-47,497c8'  
#351 cp47,497c8'  
#352 5f-apinaca'  
#353 5f apinaca'  
#354 a pinaca'  
#355 apinaca'  
#356 sgt 263'  
#357 px-2'  
#358 px 2'  
#359 px2'  
#360 px-3'  
#361 px 3'  
#362 px3'  
#363 5f-sdb-005'  
#364 5f sdb-005'  
#365 5f-sdb 005'  
#366 5f sdb 005'  
#367 5fsdb 005'  
#368 cumyl-4cn-b7aica'  
#369 cumyl 4cn-b7aica'  
#370 cumyl-4cn b7aica'  
#371 cumyl 4cn b7aica'  
#372 cumyl4cn b7aica'  
#373 cumyl 4cnb7aica'  
#374 cumyl 5f-p7aica'  
#375 cumyl-5f p7aica'  
#376 cumyl5f p7aica'  
#377 cumyl 5fp7aica'  
#378 5f-ab-p7aica'  
#379 5f ab-p7aica'  
#380 5f-ab p7aica'  
#381 5f ab p7aica'  
#382 5fab p7aica'



#383 5f-mdmb-p7aica'  
#384 5f mdmb-p7aica'  
#385 5f-mdmb p7aica'  
#386 5f mdmb p7aica'  
#387 5fmdmb p7aica'  
#388 mdmb pczca'  
#389 dmbs-chminaca'  
#390 dmbs chminaca'  
#391 a thpinaca'  
#392 adamantyl-thpinaca'  
#393 adamantyl thpinaca'  
#394 2f-ab pinaca'  
#395 app fubinaca'  
#396 5cl-mdmb pinaca'  
#397 5cl mdmb pinaca'  
#398 5clmdmb pinaca'  
#399 5cl mdmbpinaca'  
#400 5cl adb'  
#401 5f-adb-pinaca'  
#402 5f adb-pinaca'  
#403 5f-adb pinaca'  
#404 5f adb pinaca'  
#405 5fadb pinaca'  
#406 5f-app pinaca'  
#407 5f app pinaca'  
#408 5fapp pinaca'  
#409 5f-amb-pinaca'  
#410 5f amb-pinaca'  
#411 5f-amb pinaca'  
#412 5f amb pinaca'  
#413 5famb pinaca'  
#414 mo chminaca'  
#415 mo amb'  
#416 moamb'  
#417 mdmb chminac'  
#418 cumyl-pinaca'  
#419 cumyl pinaca'  
#420 5f-emb-pinaca'  
#421 5f emb-pinaca'  
#422 5f-emb pinaca'  
#423 5f emb pinaca'  
#424 5femb pinaca'  
#425 ab-fubinaca'  
#426 ab fubinaca'

#427 app-chminaca'  
#428 app chminaca'  
#429 4 cn-cumyl-binaca'  
#430 4-cn-cumyl binaca'  
#431 4 cn-cumyl binaca'  
#432 4cn cumyl-binaca'  
#433 4cn-cumyl binaca'  
#434 4cn cumyl binaca'  
#435 4 cncumyl-binaca'  
#436 4-cncumyl binaca'  
#437 4 cncumyl binaca'  
#438 4 cn-cumylbinaca'  
#439 4-cn cumylbinaca'  
#440 4cncumyl binaca'  
#441 4 cncumylbinaca'  
#442 4cn cumylbinaca'  
#443 cumyl cb-pinaca'  
#444 cumyl-cb pinaca'  
#445 cumylcb pinaca'  
#446 cumyl cbpinaca'  
#447 cumyl cy-binaca'  
#448 cumyl-cy binaca'  
#449 cumylcy binaca'  
#450 cumyl cybinaca'  
#451 sdb-005'  
#452 sdb 005'  
#453 sgt 78'  
#454 a chminaca'  
#455 mdmb-4en-pinaca'  
#456 mdmb 4en-pinaca'  
#457 mdmb-4en pinaca'  
#458 mdmb 4en pinaca'  
#459 mdmb4en pinaca'  
#460 mdmb 4enpinaca'  
#461 cumyl-4cn-binaca'  
#462 cumyl 4cn-binaca'  
#463 cumyl-4cn binaca'  
#464 cumyl 4cn binaca'  
#465 cumyl4cn binaca'  
#466 cumyl 4cnbinaca'  
#467 5f-cumyl-pinaca'  
#468 5f cumyl-pinaca'  
#469 5f-cumyl pinaca'  
#470 5f cumyl pinaca'

#471 5fcumyl pinaca'  
#472 cumyl-5f-pinaca'  
#473 cumyl 5f-pinaca'  
#474 cumyl-5f pinaca'  
#475 cumyl 5f pinaca'  
#476 cumyl5f pinaca'  
#477 cumyl 5f pinaca'  
#478 5cl-ab-pinaca'  
#479 5cl ab-pinaca'  
#480 5cl-ab pinaca'  
#481 5cl ab pinaca'  
#482 5clab pinaca'  
#483 adb-fubinaca'  
#484 adb fubinaca'  
#485 adb-pinaca'  
#486 adb pinaca'  
#487 5f-py-pinaca'  
#488 5f py-pinaca'  
#489 5f-py pinaca'  
#490 5f py pinaca'  
#491 5cl ur-144'  
#492 5cl-ur 144'  
#493 5cl ur 144'  
#494 5clur 144'  
#495 fdu-pb-22'  
#496 fdu pb-22'  
#497 fdu-pb 22'  
#498 fdu pb 22'  
#499 fdupb 22'  
#500 nnei'  
#501 am xiao'  
#502 am-679'  
#503 am 679'  
#504 am679'  
#505 am-694'  
#506 am 694'  
#507 am694'  
#508 jwh 387'  
#509 win 48,098'  
#510 win48,098'  
#511 am-2232'  
#512 am 2232'  
#513 jwh-019'  
#514 jwh019'

#515 jwh 019'  
#516 jwh-022'  
#517 jwh 022'  
#518 jwh-081'  
#519 jwh081'  
#520 jwh 081'  
#521 f2201'  
#522 jwh-412'  
#523 jwh 412'  
#524 ur-144'  
#525 ur144'  
#526 ur 144'  
#527 am-2233'  
#528 am2233'  
#529 am 2233'  
#530 eam-2201'  
#531 eam2201'  
#532 eam 2201'  
#533 jwh-210'  
#534 jwh 210'  
#535 jwh-015'  
#536 jwh015'  
#537 jwh 015'  
#538 ab-001'  
#539 ab001'  
#540 ab 001'  
#541 jwh-251'  
#542 jwh 251'  
#543 cbl 018'  
#544 fub jwh-018'  
#545 fub-jwh 018'  
#546 fub jwh 018'  
#547 fubjwh 018'  
#548 fub-jwh018'  
#549 fub jwh018'  
#550 fub 018'  
#551 jwh-302'  
#552 jwh 302'  
#553 adb-chmica'  
#554 adb chmica'  
#555 ab-005'  
#556 ab005'  
#557 ab 005'  
#558 adb ica'

#559 adbica'  
#560 am-1248'  
#561 am 1248'  
#562 bb-22'  
#563 bb 22'  
#564 bb22'  
#565 quchic'  
#566 fub-pb-22'  
#567 fub-pb 22'  
#568 fub pb-22'  
#569 fub pb 22'  
#570 fubpb 22'  
#571 am-1220'  
#572 am1220'  
#573 am 1220'  
#574 nrg-4'  
#575 nrg4'  
#576 nrg 4'  
#577 rcs-4'  
#578 rcs4'  
#579 rcs 4'  
#580 px-1'  
#581 px1'  
#582 px 1'  
#583 5f-app-pica'  
#584 5f app-pica'  
#585 5f app pica'  
#586 5fsdb 006'  
#587 a-796,260'  
#588 a796,260'  
#589 a 796,260'  
#590 a-834,735'  
#591 5f-adbica'  
#592 5f adbica'  
#593 5f-adb pica'  
#594 5f adb pica'  
#595 jwh-018'  
#596 jwh018'  
#597 jwh 018'  
#598 chm 018'  
#599 ne-chmimo'  
#600 ne chmimo'  
#601 mmb-2201'  
#602 mmb 2201'

#603 cumyl-bica'  
#604 cumyl bica'  
#605 cumyl-pica'  
#606 cumyl pica'  
#607 5-fluor nnei'  
#608 5 fluor-nnei'  
#609 5fluor nnei'  
#610 5 fluornnei'  
#611 5f nnei'  
#612 am-6527'  
#613 am6527'  
#614 am 6527'  
#615 am-2201'  
#616 am2201'  
#617 am 2201'  
#618 jwh-073'  
#619 jwh073'  
#620 jwh 073'  
#621 mam-2201'  
#622 mam2201'  
#623 mam 2201'  
#624 mdmb-chmica'  
#625 mdmb chmica'  
#626 jwh-200'  
#627 jwh 200'  
#628 jwh-122'  
#629 jwh122'  
#630 jwh 122'  
#631 fub ur-144'  
#632 fub ur 144'  
#633 fub-ur 144'  
#634 fubur 144'  
#635 fub 144'  
#636 5f-pb-22'  
#637 5f pb-22'  
#638 5f pb 22'  
#639 5f-pb 22'  
#640 5f-pb22'  
#641 5f pb22'  
#642 km x1'  
#643 km-x1'  
#644 kmx-1'  
#645 kmx 1'  
#646 kmx1'

#647 tmcp 018'  
#648 mn-001'  
#649 mn001'  
#650 mn 001'  
#651 mdmb-fubica'  
#652 mdmb fubica'  
#653 5f mdmb-2201'  
#654 5f mdmb 2201'  
#655 mdmb-2201'  
#656 mdmb 2201'  
#657 5f-mdmb-pica'  
#658 5f mdmb-pica'  
#659 5f-mdmb pica'  
#660 5f mdmb pica'  
#661 amb-chmica'  
#662 amb chmica'  
#663 cbl-2201'  
#664 cbl2201'  
#665 cbl 2201'  
#666 nm-2201'  
#667 nm2201'  
#668 nm 2201'  
#669 sts-135'  
#670 sts135'  
#671 sts 135'  
#672 5f-apica'  
#673 5f apica'  
#674 5f-cumyl-pica'  
#675 5f cumyl-pica'  
#676 5f-cumyl pica'  
#677 5f cumyl pica'  
#678 pb-22'  
#679 pb22'  
#680 pb 22'  
#681 5f-ab 144'  
#682 5f ab 144'  
#683 5fab 144'  
#684 5fadbica 144'  
#685 5f-ambica'  
#686 5f ambica'  
#687 xlr-11'  
#688 xlr11'  
#689 xlr 11'  
#690 5 fur-144'

#691 5fur-144'  
#692 5fur 144'  
#693 5 fur144'  
#694 sdb-006'  
#695 sdb 006'  
#696 5f apinac'  
#697 5f-py-pica'  
#698 5f py-pica'  
#699 5f-py pica'  
#700 5f py pica'  
#701 cra13'  
#702 cb-13'  
#703 cb13'  
#704 cb 13'  
#705 sab-378'  
#706 sab378'  
#707 sab 378'  
#708 az-037'  
#709 az 037'  
#710 5f-5,3-ab-pfuppyca'  
#711 5f-5,3 ab-pfuppyca'  
#712 5f 5,3 ab pfuppyca'  
#713 5f5,3-ab-pfuppyca'  
#714 5f5,3 ab-pfuppyca'  
#715 5f-5,3ab-pfuppyca'  
#716 5f-5,3-abpfuppyca'  
#717 5f-5,3 abpfuppyca'  
#718 5f5,3ab-pfuppyca'  
#719 5f-5,3abpfuppyca'  
#720 5f5,3-abpfuppyca'  
#721 5f5,3 abpfuppyca'  
#722 5f5,3abpfuppyca'  
#723 5f-sgt-151'  
#724 5f sgt-151'  
#725 5f-sgt 151'  
#726 5f sgt 151'  
#727 5fsgt 151'  
#728 5f-sgt151'  
#729 5f-cumyl-pegacalone'  
#730 5f cumyl-pegacalone'  
#731 5f-cumyl pegacalone'  
#732 5f cumyl pegacalone'  
#733 5fcumyl pegacalone'  
#734 sgt-151'



#735 sgt 151'  
#736 cumyl-pegacalone'  
#737 cumyl pegacalone'  
#738 cumyl ch-megaclone'  
#739 cumyl-ch megaclone'  
#740 cumylch megaclone'  
#741 cumyl chmegaclone'  
#742 jwh 145'  
#743 jwh-030'  
#744 jwh 030'  
#745 jwh-307'  
#746 jwh 307'  
#747 jwh 182'  
#748 jwh 370'  
#749 jwh 368'  
#750 a-836,339'  
#751 mda-19'  
#752 mda19'  
#753 mda 19'  
#754 hu-210'  
#755 hu210'  
#756 hu 210'  
#757 hu-331'  
#758 hu331'  
#759 hu 331'  
#760 trans-cp-47,497-c8'  
#761 trans cp-47,497-c8'  
#762 trans-cp 47,497-c8'  
#763 trans-cp-47,497 c8'  
#764 trans-cp 47,497 c8'  
#765 trans cp 47,497c8'  
#766 trans cp 47,497-c8'  
#767 trans cp 47,497 c8'  
#768 transcp-47,497-c8'  
#769 transcp 47,497-c8'  
#770 transcp-47,497 c8'  
#771 transcp and 47,497 and c8'  
#772 trans-cp47,497-c8'  
#773 trans-cp47,497 c8'  
#774 trans-cp-47,497c8'  
#775 trans-cp 47,497c8'  
#776 transcp47,497-c8'  
#777 transcp47,497 c8'  
#778 trans cp47,497c8'

#779 transcp 47,497c8'  
#780 win 55212-2'  
#781 win-55212-2'  
#782 win55212-2'  
#783 win 55212 2'  
#784 win552122'  
#785 win-55212 2'  
#786 win55212 2'  
#787 5f-adb'  
#788 5f adb'  
#789 5f npb-22-7n'  
#790 5f-npb 22-7n'  
#791 5f-npb-22 7n'  
#792 5f npb 22 7n'  
#793 5f-npb 22 7n'  
#794 5f npb-22 7n'  
#795 5f npb 22-7n'  
#796 5fnpb 22-7n'  
#797 5fnpb-22 7n'  
#798 5fnpb 22 7n'  
#799 5f-npb22 7n'  
#800 5f npb22 7n'  
#801 5f np b227n'  
#802 5fnpb22 7n'  
#803 5fnpb 227n'  
#804 5f akb-48-7n'  
#805 5f-akb 48-7n'  
#806 5f-akb-48 7n'  
#807 5f akb 48 7n'  
#808 5f-akb 48 7n'  
#809 5f akb-48 7n'  
#810 5f akb 48-7n'  
#811 5f-akb 487n'  
#812 5fakb48 7n'  
#813 5f-edmb-pinaca'  
#814 5f edmb-pinaca'  
#815 5f-edmb pinaca'  
#816 5f edmb pinaca'  
#817 5fedmb pinaca'  
#818 5f-mdmb-pinaca'  
#819 5f mdmb-pinaca'  
#820 5f-mdmb pinaca'  
#821 5f mdmb pinaca'  
#822 5fmdmb pinaca'

#823 emb-fubinaca'  
#824 emb fubinaca'  
#825 eg-018'  
#826 eg 018'  
#827 eg-2201'  
#828 5f-ab-pinaca'  
#829 5f ab-pinaca'  
#830 5f-ab pinaca'  
#831 5f ab pinaca'  
#832 5fab pinaca'  
#833 5f-amb'  
#834 5f amb'  
#835 ab-chminaca'  
#836 ab chminaca'  
#837 ab-pinaca'  
#838 ab pinaca'  
#839 abpinaca'  
#840 fubimina'  
#841 ab-pinaca-chm'  
#842 ab pinaca-chm'  
#843 ab-pinaca chm'  
#844 ab pinaca chm'  
#845 tmcp-2201'  
#846 tmcp 2201'  
#847 mba-2201'  
#848 mba 2201'  
#849 qcbl(n)-2201'  
#850 qcbl(n) 2201'  
#851 qcbl(n)2201'  
#852 cp55, 940'  
#853 cp55,940'  
#854 mdmb-chminaca'  
#855 mdmb chminaca'  
#856 amb-fubinaca'  
#857 amb fubinaca'  
#858 mmb-fubinaca'  
#859 mmb fubinaca'  
#860 fub-amb'  
#861 fub amb'  
#862 mdmb-fubinaca'  
#863 mdmb fubinaca'  
#864 qupic'  
#865 5f-qupic'  
#866 5f qupic'

#867 npb-22'  
#868 npb 22'  
#869 5f-npb-22'  
#870 5f npb-22'  
#871 5f-npb 22'  
#872 5f npb 22'  
#873 5fnpb 22'  
#874 fub-npb-22'  
#875 fub npb-22'  
#876 fub-npb 22'  
#877 fub npb 22'  
#878 fubnpb 22'  
#879 fub npb22'  
#880 mmb-chminaca'  
#881 mmb chminaca'  
#882 mdmb-chmczca'  
#883 mdmb chmczca'  
#884 amb chminaca'  
#885 win55212'  
#886 trans cp-47,497 c8'  
#887 transcp 47,497 c8'  
#888 trans cp-47,497c8'  
#889 tetrahydrocannabivarin'  
#890 cannabigerol'  
#891 11-hydroxy-thc'  
#892 11 hydroxy-thc'  
#893 11-hydroxy thc'  
#894 11 hydroxy thc'  
#895 11hydroxy thc'  
#896 11-hydroxythc'  
#897 11 hydroxythc'  
#898 11-oh-thc'  
#899 11 oh-thc'  
#900 11-oh thc'  
#901 11 oh thc'  
#902 11-ohthc'  
#903 11 ohthc'  
#904 11-hydroxy-tetrahydrocannabinol'  
#905 11 hydroxy-tetrahydrocannabinol'  
#906 11-hydroxy tetrahydrocannabinol'  
#907 11 hydroxy tetrahydrocannabinol'  
#908 11hydroxy tetrahydrocannabinol'  
#909 11-hydroxytetrahydrocannabinol'  
#910 11 hydroxytetrahydrocannabinol'

#911 11 oh-delta-9-thc'  
#912 11-oh delta-9-thc'  
#913 11-oh-delta 9-thc'  
#914 11-oh-delta-9 thc'  
#915 11 oh delta 9 thc'  
#916 11-oh delta 9 thc'  
#917 11 oh-delta 9 thc'  
#918 11 oh delta-9 thc'  
#919 11 oh delta 9-thc'  
#920 11-oh-delta 9 thc'  
#921 11 oh-delta-9 thc'  
#922 11 oh delta-9-thc'  
#923 11-oh delta-9 thc'  
#924 11 oh-delta 9-thc'  
#925 11-oh delta 9-thc'  
#926 11oh-delta 9-thc'  
#927 11oh-delta-9 thc'  
#928 11oh-delta 9 thc'  
#929 11 ohdelta-9-thc'  
#930 11-ohdelta 9-thc'  
#931 11-ohdelta-9 thc'  
#932 11-oh-delta9-thc'  
#933 11 oh-delta9-thc'  
#934 11-oh delta9-thc'  
#935 11-oh-delta9 thc'  
#936 11 oh delta9 thc'  
#937 11-oh delta9 thc'  
#938 11 oh-delta9 thc'  
#939 11 oh delta9-thc'  
#940 11 oh-delta-9thc'  
#941 11-oh delta 9thc'  
#942 11 oh delta 9thc'  
#943 delta-8-tetrahydrocannabinol'  
#944 delta 8-tetrahydrocannabinol'  
#945 delta-8 tetrahydrocannabinol'  
#946 delta 8 tetrahydrocannabinol'  
#947 delta8-tetrahydrocannabinol'  
#948 delta8 tetrahydrocannabinol'  
#949 delta 8tetrahydrocannabinol'  
#950 delta8tetrahydrocannabinol'  
#951 d 8-tetrahydrocannabinol'  
#952 d-8 tetrahydrocannabinol'  
#953 d 8 tetrahydrocannabinol'  
#954  $\delta$ -8-tetrahydrocannabinol'

#955  $\delta$  8-tetrahydrocannabinol'  
#956  $\delta$ -8 tetrahydrocannabinol'  
#957  $\delta$  8 tetrahydrocannabinol'  
#958  $\delta$ 8-tetrahydrocannabinol'  
#959  $\delta$ 8 tetrahydrocannabinol'  
#960  $\delta$  8tetrahydrocannabinol'  
#961  $\delta$ 8tetrahydrocannabinol'  
#962 delta-8-thc'  
#963 delta 8-thc'  
#964 delta-8 thc'  
#965 delta 8 thc'  
#966 delta8-thc'  
#967 delta8 thc'  
#968 delta-8thc'  
#969 delta 8thc'  
#970 delta8thc'  
#971 d 8-thc'  
#972 d-8 thc'  
#973 d 8 thc'  
#974 d8thc'  
#975  $\delta$ -8-thc'  
#976  $\delta$  8-thc'  
#977  $\delta$ -8 thc'  
#978  $\delta$  8 thc'  
#979  $\delta$ 8-thc'  
#980  $\delta$ 8 thc'  
#981  $\delta$ -8thc'  
#982  $\delta$  8thc'  
#983  $\delta$ 8thc'  
#984 anandamide'  
#985 n-arachidonylethanolamine'  
#986 n arachidonylethanolamine'  
#987 9-thc'  
#988 9 thc'  
#989 9thc'  
#990 delta-tetrahydrocannabinol'  
#991 delta tetrahydrocannabinol'  
#992 deltatetrahydrocannabinol'  
#993 d-tetrahydrocannabinol'  
#994 d tetrahydrocannabinol'  
#995  $\delta$ -tetrahydrocannabinol'  
#996  $\delta$  tetrahydrocannabinol'  
#997  $\delta$ tetrahydrocannabinol'  
#998 delta-thc'

#999 delta thc'  
#1000 deltathc'  
#1001 d-thc'  
#1002 d thc'  
#1003 dthc'  
#1004  $\delta$ -thc'  
#1005  $\delta$  thc'  
#1006  $\delta$ thc'  
#1007 11-palmitoyloxy-d 9-tetrahydrocannabinol'  
#1008 11-palmitoyloxy- $\delta$  9-tetrahydrocannabinol'  
#1009 11-palmitoyloxy-delta 9-thc'  
#1010 11-palmitoyloxy-d 9-thc'  
#1011 11-palmitoyloxy- $\delta$  9-thc'  
#1012 11-palm-d 9-thc'  
#1013 11-palm- $\delta$  9-thc'  
#1014 11-palm-delta 9-tetrahydrocannabinol'  
#1015 11-palm-d 9-tetrahydrocannabinol'  
#1016 11-palm- $\delta$  9-tetrahydrocannabinol'  
#1017 cp55940'  
#1018 cp-55940'  
#1019 cp 55940'  
#1020 cp-55,940'  
#1021 cp 55,940'  
#1022 11-oh-tetrahydrocannabinol'  
#1023 11 oh-tetrahydrocannabinol'  
#1024 11-oh tetrahydrocannabinol'  
#1025 11 oh tetrahydrocannabinol'  
#1026 11 ohtetrahydrocannabinol'  
#1027 beta hhc'  
#1028 beta-hhc'  
#1029  $\beta$ -hhc'  
#1030  $\beta$  hhc'  
#1031 b hhc'  
#1032 bhhc'  
#1033 beta-hydroxyhexahydrocannabinol'  
#1034 beta hydroxyhexahydrocannabinol'  
#1035  $\beta$ -hydroxyhexahydrocannabinol'  
#1036  $\beta$  hydroxyhexahydrocannabinol'  
#1037 b hydroxyhexahydrocannabinol'  
#1038 hydroxyhexahydrocannabinol'  
#1039 methanandamide'  
#1040 am-356'  
#1041 am356'  
#1042 am 356'

#1043 sr-141716-a'  
#1044 sr 141716-a'  
#1045 sr-141716 a'  
#1046 sr 141716 a'  
#1047 sr141716-a'  
#1048 sr141716 a'  
#1049 sr-141716a'  
#1050 sr 141716a'  
#1051 sr141716a'  
#1052 delta-9-tetrahydrocannabuto'  
#1053 delta 9-tetrahydrocannabuto'  
#1054 delta-9 tetrahydrocannabuto'  
#1055 delta 9 tetrahydrocannabuto'  
#1056 delta9-tetrahydrocannabuto'  
#1057 delta9 tetrahydrocannabuto'  
#1058 delta9tetrahydrocannabuto'  
#1059  $\delta$ -9-tetrahydrocannabuto'  
#1060  $\delta$  9-tetrahydrocannabuto'  
#1061  $\delta$ -9 tetrahydrocannabuto'  
#1062  $\delta$  9 tetrahydrocannabuto'  
#1063  $\delta$ 9-tetrahydrocannabuto'  
#1064  $\delta$ 9 tetrahydrocannabuto'  
#1065 delta-9-thcb'  
#1066 delta 9-thcb'  
#1067 delta-9 thcb'  
#1068 delta 9 thcb'  
#1069 delta9 thcb'  
#1070  $\delta$ -9-thcb'  
#1071  $\delta$  9-thcb'  
#1072  $\delta$ -9 thcb'  
#1073  $\delta$  9 thcb'  
#1074  $\delta$ 9 thcb'  
#1075 cbda'  
#1076 hu-580'  
#1077 hu 580'  
#1078 cbdv'  
#1079 cannabidivarin\*  
#1080 cp-47497'  
#1081 cp 47497'  
#1082 cp47497'  
#1083 trans-cch'  
#1084 cannabicyclohexanol'  
#1085 delta-(1)-tetrahydrocannabinolic acid'  
#1086 delta (1)-tetrahydrocannabinolic acid'



#1087 delta-(1) tetrahydrocannabinolic acid'  
#1088 delta (1) tetrahydrocannabinolic acid'  
#1089 delta(1)-tetrahydrocannabinolic acid'  
#1090 delta(1) tetrahydrocannabinolic acid'  
#1091 delta-(1)tetrahydrocannabinolic acid'  
#1092 delta (1)tetrahydrocannabinolic acid'  
#1093 delta(1)tetrahydrocannabinolic acid'  
#1094 delta-1-tetrahydrocannabinolic acid'  
#1095 delta 1-tetrahydrocannabinolic acid'  
#1096 delta-1 tetrahydrocannabinolic acid'  
#1097 delta 1 tetrahydrocannabinolic acid'  
#1098 delta1-tetrahydrocannabinolic acid'  
#1099 delta1 tetrahydrocannabinolic acid'  
#1100  $\delta$ -(1)-tetrahydrocannabinolic acid'  
#1101  $\delta$  (1)-tetrahydrocannabinolic acid'  
#1102  $\delta$ -(1) tetrahydrocannabinolic acid'  
#1103  $\delta$  (1) tetrahydrocannabinolic acid'  
#1104  $\delta$ (1)-tetrahydrocannabinolic acid'  
#1105  $\delta$ (1) tetrahydrocannabinolic acid'  
#1106  $\delta$ -(1)tetrahydrocannabinolic acid'  
#1107  $\delta$  (1)tetrahydrocannabinolic acid'  
#1108  $\delta$ (1)tetrahydrocannabinolic acid'  
#1109  $\delta$ -1-tetrahydrocannabinolic acid'  
#1110  $\delta$  1-tetrahydrocannabinolic acid'  
#1111  $\delta$ -1 tetrahydrocannabinolic acid'  
#1112  $\delta$  1 tetrahydrocannabinolic acid'  
#1113  $\delta$ 1-tetrahydrocannabinolic acid'  
#1114  $\delta$ 1 tetrahydrocannabinolic acid'  
#1115 d-(1)-tetrahydrocannabinolic acid'  
#1116 d (1)-tetrahydrocannabinolic acid'  
#1117 d-(1) tetrahydrocannabinolic acid'  
#1118 d (1) tetrahydrocannabinolic acid'  
#1119 d(1)-tetrahydrocannabinolic acid'  
#1120 d(1) tetrahydrocannabinolic acid'  
#1121 d-(1)tetrahydrocannabinolic acid'  
#1122 d (1)tetrahydrocannabinolic acid'  
#1123 d(1)tetrahydrocannabinolic acid'  
#1124 d-1 tetrahydrocannabinolic acid'  
#1125 d 1 tetrahydrocannabinolic acid'  
#1126 delta-(1)-thca'  
#1127 delta (1)-thca'  
#1128 delta-(1) thca'  
#1129 delta (1) thca'  
#1130 delta(1)-thca'

#1131 delta(1) thca'  
#1132 delta-(1)thca'  
#1133 delta (1)thca'  
#1134 delta(1)thca'  
#1135 delta-1-thca'  
#1136 delta 1-thca'  
#1137 delta-1 thca'  
#1138 delta 1 thca'  
#1139 delta1 thca'  
#1140  $\delta$ -(1)-thca'  
#1141  $\delta$  (1)-thca'  
#1142  $\delta$ -(1) thca'  
#1143  $\delta$  (1) thca'  
#1144  $\delta$ (1)-thca'  
#1145  $\delta$ (1) thca'  
#1146  $\delta$ -(1)thca'  
#1147  $\delta$  (1)thca'  
#1148  $\delta$ (1)thca'  
#1149  $\delta$ -1-thca'  
#1150  $\delta$  1-thca'  
#1151  $\delta$ -1 thca'  
#1152  $\delta$  1 thca'  
#1153  $\delta$ 1 thca'  
#1154 d-(1)-thca'  
#1155 d (1)-thca'  
#1156 d-(1) thca'  
#1157 d (1) thca'  
#1158 d(1)-thca'  
#1159 d(1) thca'  
#1160 d-(1)thca'  
#1161 d (1)thca'  
#1162 d(1)thca'  
#1163 d 1 thca'  
#1164 thca\*  
#1165 nor-9 $\beta$ -hydroxyhexahydrocannabinol'  
#1166 nor 9 $\beta$ -hydroxyhexahydrocannabinol'  
#1167 nor-9 $\beta$  hydroxyhexahydrocannabinol'  
#1168 nor 9 $\beta$  hydroxyhexahydrocannabinol'  
#1169 nor9 $\beta$  hydroxyhexahydrocannabinol'  
#1170 9-beta-hydroxy-hexahydrocannabinol'  
#1171 9-nor-9 $\beta$ -oh-hhc'  
#1172 9-nor-9 $\beta$ -hydroxyhexahydrocannabinol'  
#1173 hash'  
#1174 ganja'

#1175 bhang'  
#1176 OR/1-1175  
#1177 rheumatoid arthritis'/de  
#1178 ra'  
#1179 rheumat\*  
#1180 reumat\*  
#1181 super rheumatoid'  
#1182 antirheumat\*  
#1183 antireumat\*  
#1184 anti-rheumatic'  
#1185 anti-rheumatoid'  
#1186 anti-reumatic'  
#1187 anti-reumatoid'  
#1188 (('caplan?s' OR 'caplan' OR 'felty?s' OR 'felty') AND (syndrom\* OR disease\*))  
#1189 felty syndrome'/de  
#1190 caplan syndrome'/de  
#1191 rheumatoid nodule'/de  
#1192 OR/1177-1191  
#1193 random\*:ab,ti  
#1194 (clinical NEXT/1 trial\*):de,ab,ti  
#1195 health care quality'/exp  
#1196 OR/1193-1195  
#1197 #1176 AND #1192 AND #1196
